# Supplementary material for: The Genomic Ecosystem of Transposable Elements in Maize
Source: bioRxiv or medRxiv preprint supplement (doi:10.1101/559922), 2019-02-28
Supplement: Supplementary file [file media-1.pdf]

**Supplemental Information for *The Genomic Ecosystem of Transposable Elements in Maize*,  
Stitzer MC, Anderson SN, Springer NM, and Ross-Ibarra J**

---

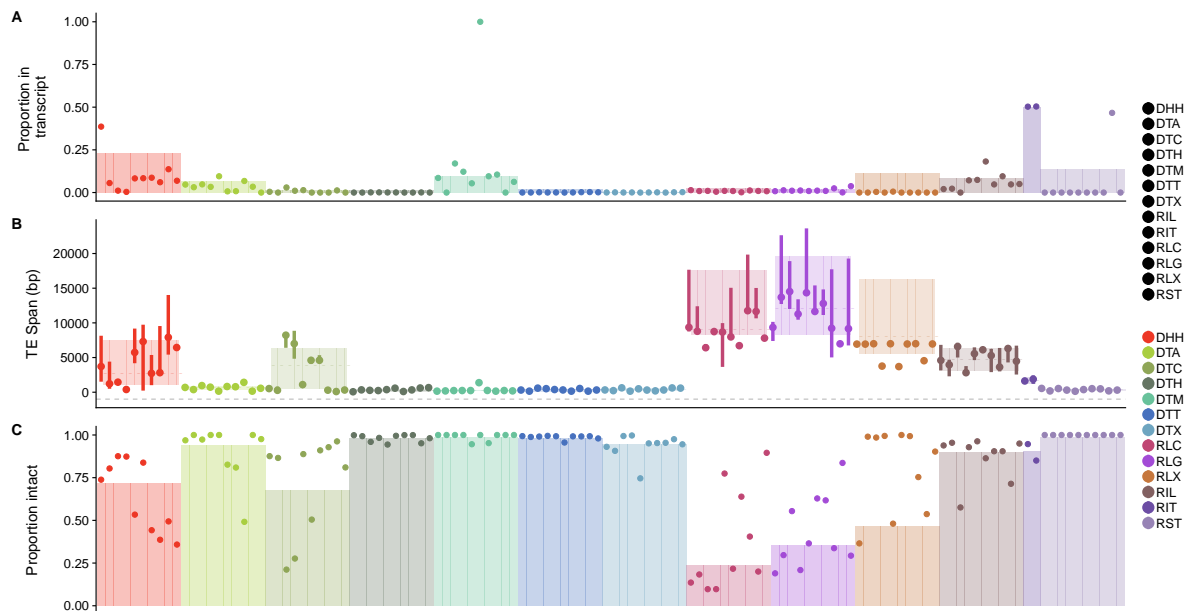

**Fig. S1. Family characteristics of each of the largest 10 families of each superfamily with at least 10 copies.** (A) Proportion of TEs within the transcript of a gene, including introns and UTRs. (B) TE span along the genome, summing both the base pairs of the TE and the base pairs of the TEs nested within it. (C) Proportion of TEs that are intact, that is, uninterrupted by the insertion of another TE. In (A and C), families are shown as points and superfamily proportions as a barplot, and in (B) families are shown with medians as points and lines representing ranges of upper to lower quartiles, with superfamilies shown as colored rectangles.

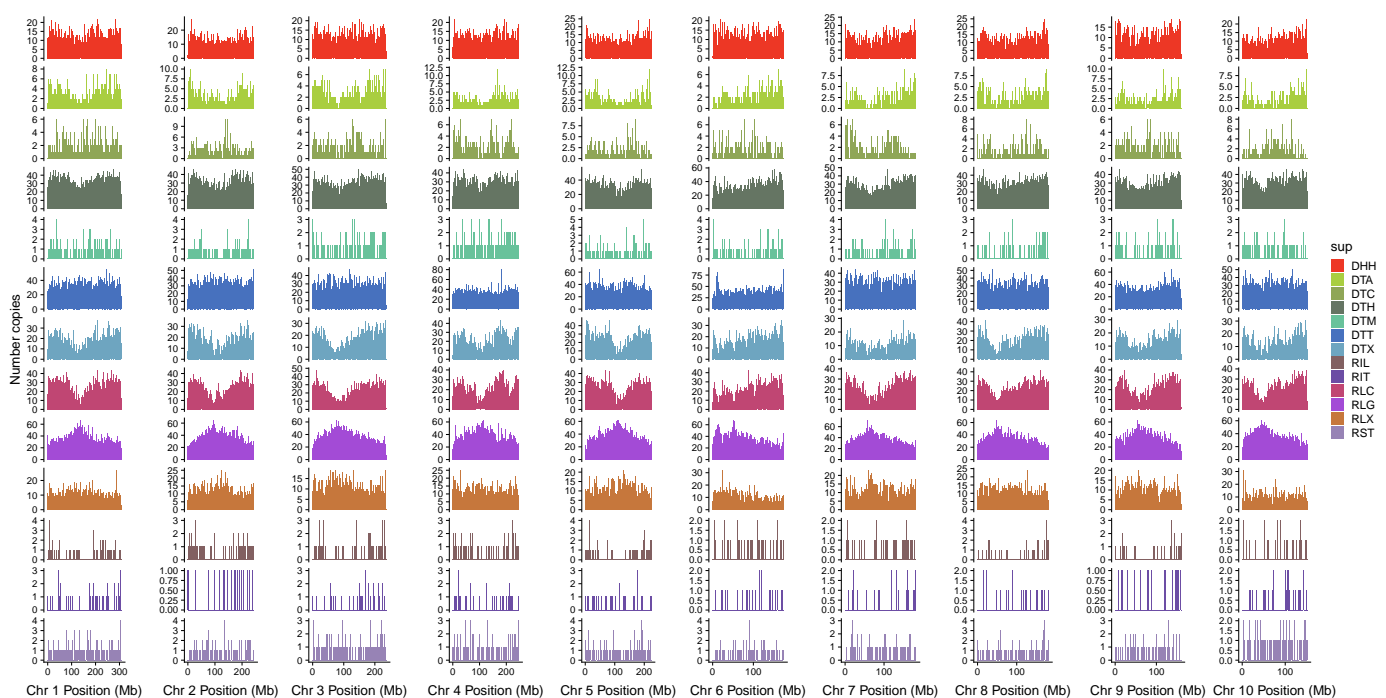

**Fig. S2. Chromosomal distribution of superfamilies across all 10 maize chromosomes** Count of TE copies of each superfamily in 1 megabase bins across each chromosome.

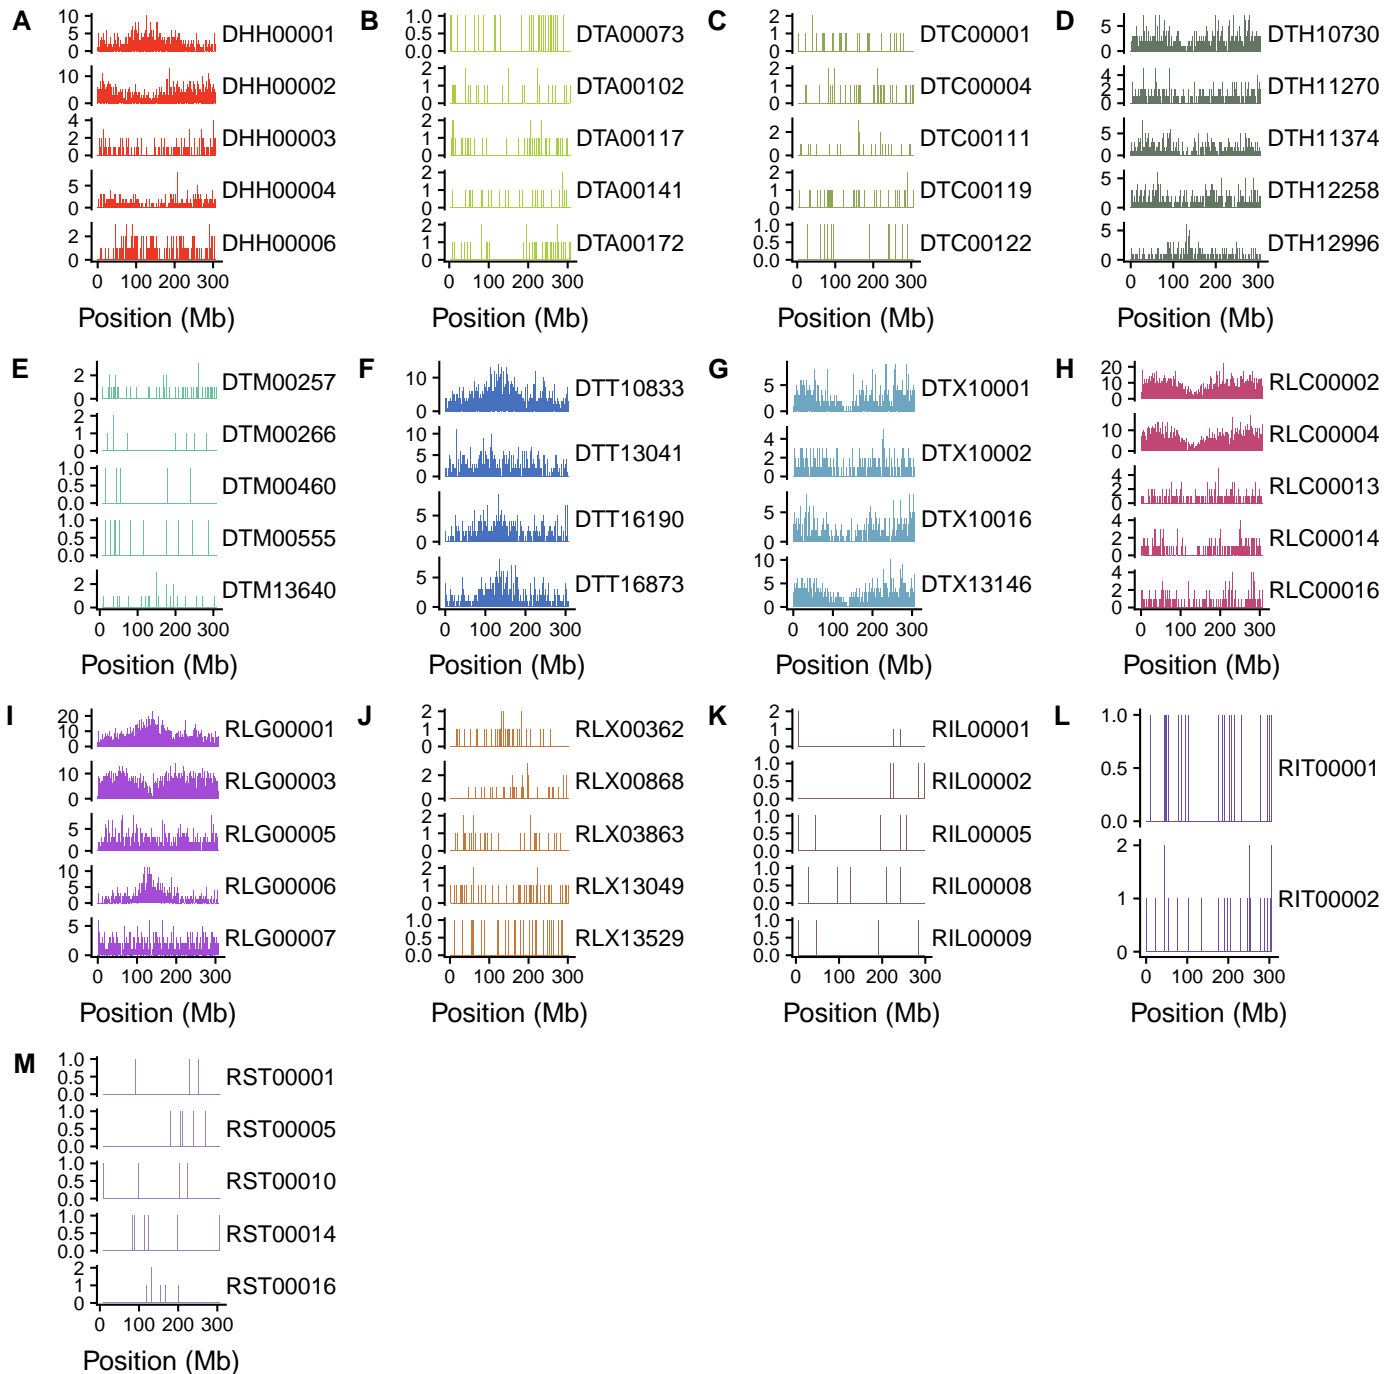

**Fig. S3. Distribution on chromosome 1 of five largest families with at least ten copies in each superfamily** Count of TE copies in 1 megabase bins along chromosome 1. (A) DHH, (B) DTA, (C) DTC, (D) DTH, (E) DTM, (F) DTT, (G) DTX, (H) RLC, (I) RLG, (J) RLX, (K) RIL, (L) RIT, (M) RST. Note that some families have no copies on chromosome 1, including DTT10880 and DTX10177. Additionally, the RIT superfamily only has two families.

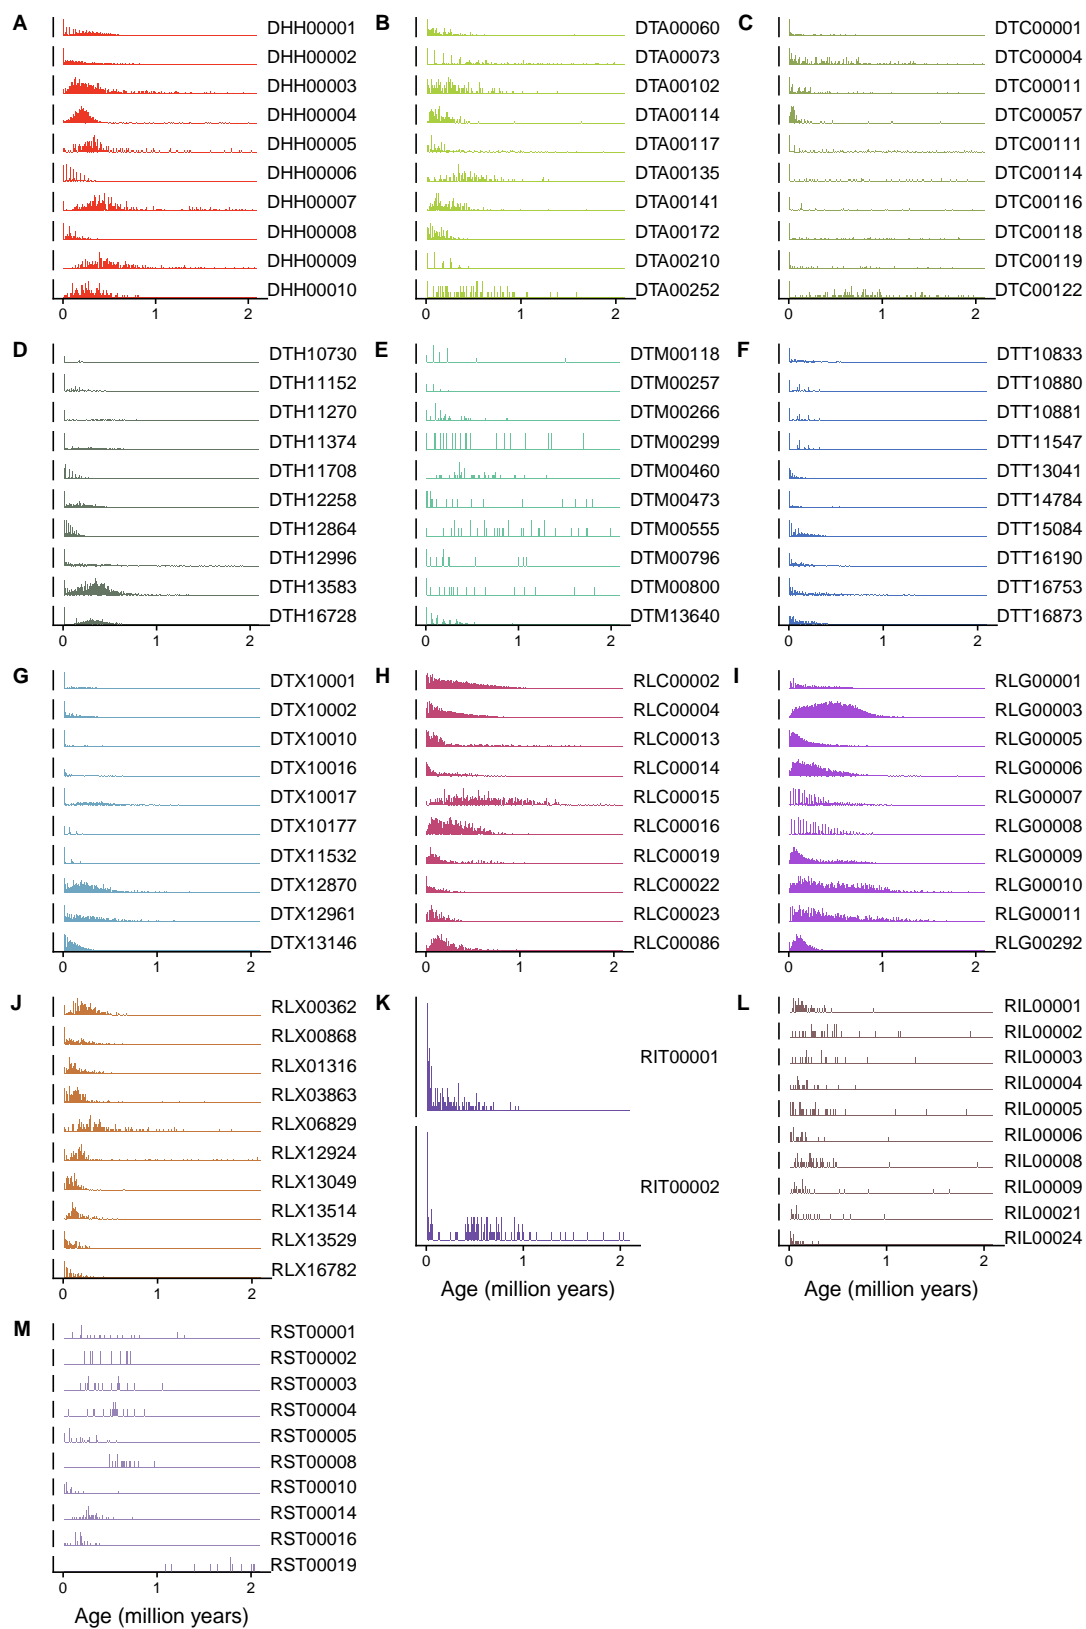

**Fig. S4. Ages in 10,000 year bins across each of the largest 10 families of each superfamily with at least 10 copies.** (A) DHH, (B) DTA, (C) DTC, (D) DTH, (E) DTM, (F) DTT, (G) DTX, (H) RLC, (I) RLG, (J) RLX, (K) RIL, (L) RIT, (M) RST. The RIT superfamily only contains two families.



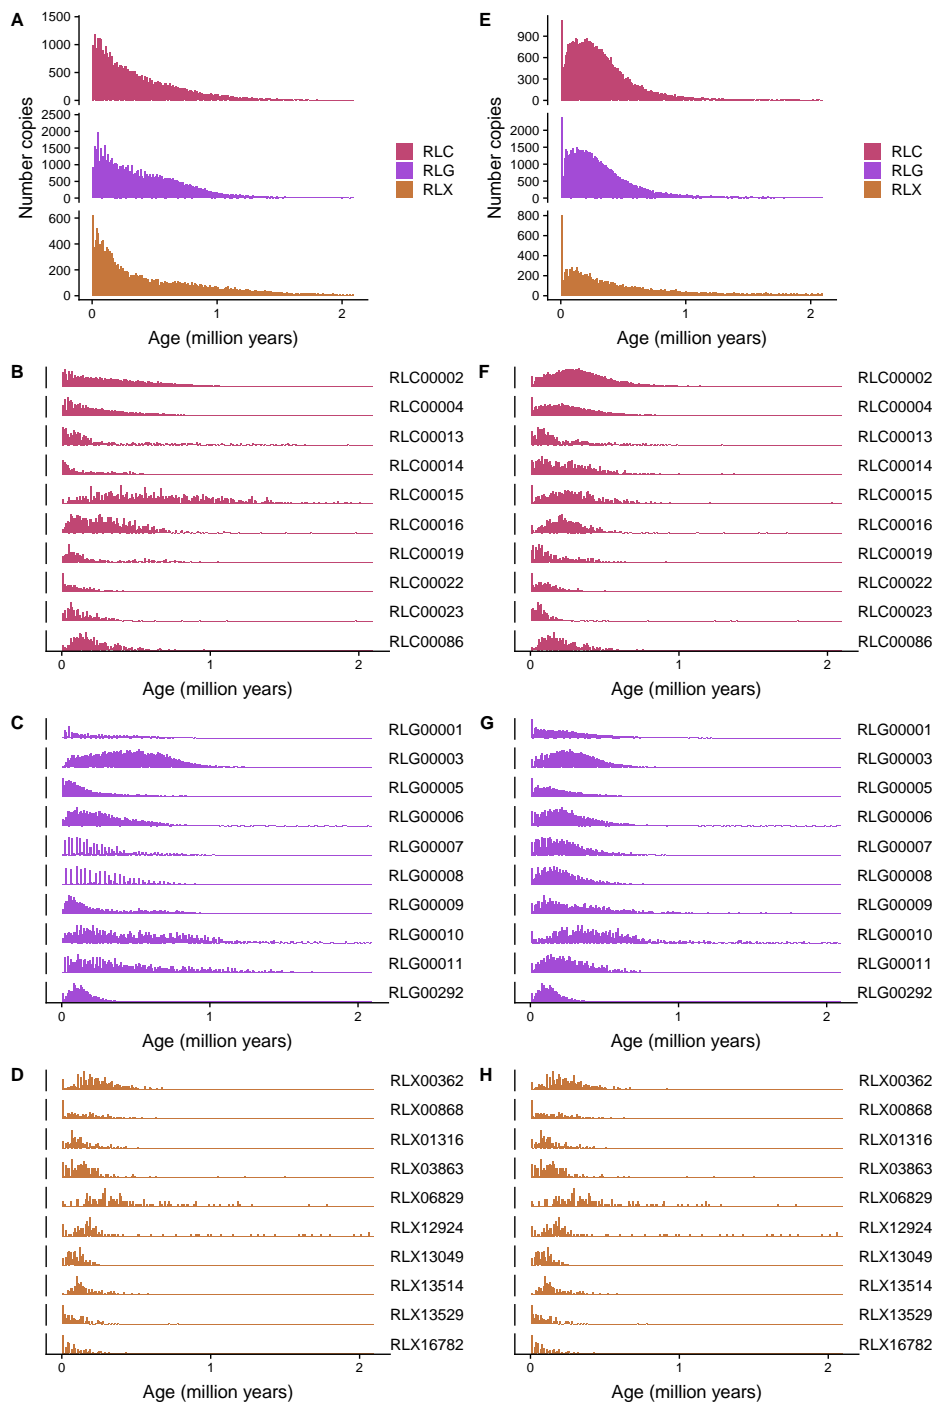

**Fig. S5. LTR-LTR ages and terminal branch length ages for LTR retrotransposons.** Ages in 10,000 year bins across each of the largest 10 families of each superfamily with at least 10 copies. Left plots (A-D) show LTR-LTR ages, right plots (E-H) show terminal branch length (TBL) ages. (A) all copies, LTR-LTR, (B) all copies, TBL, (C) RLC families, LTR-LTR, (D) RLC families, TBL, (E) RLG families, LTR-LTR, (F) RLG families, TBL, (G) RLX families, LTR-LTR, (H) RLX families, TBL.

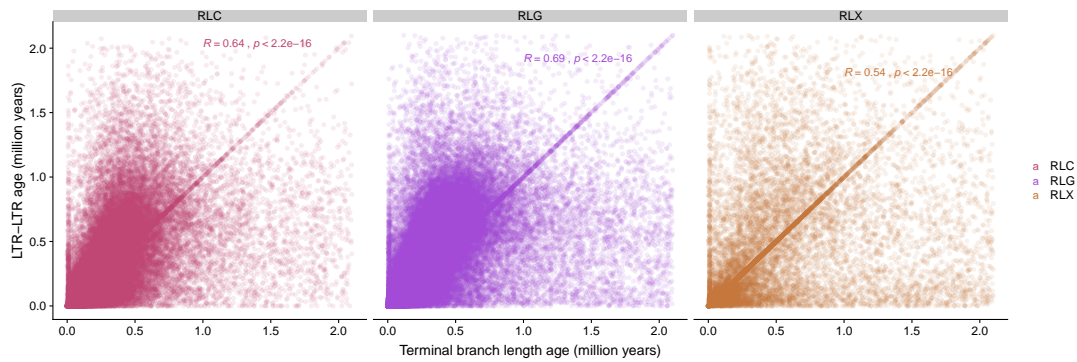

**Fig. S6. LTR-LTR ages vs. terminal branch length ages for LTR retrotransposon superfamilies.** Spearman's correlation coefficient shown on plot for each superfamily.

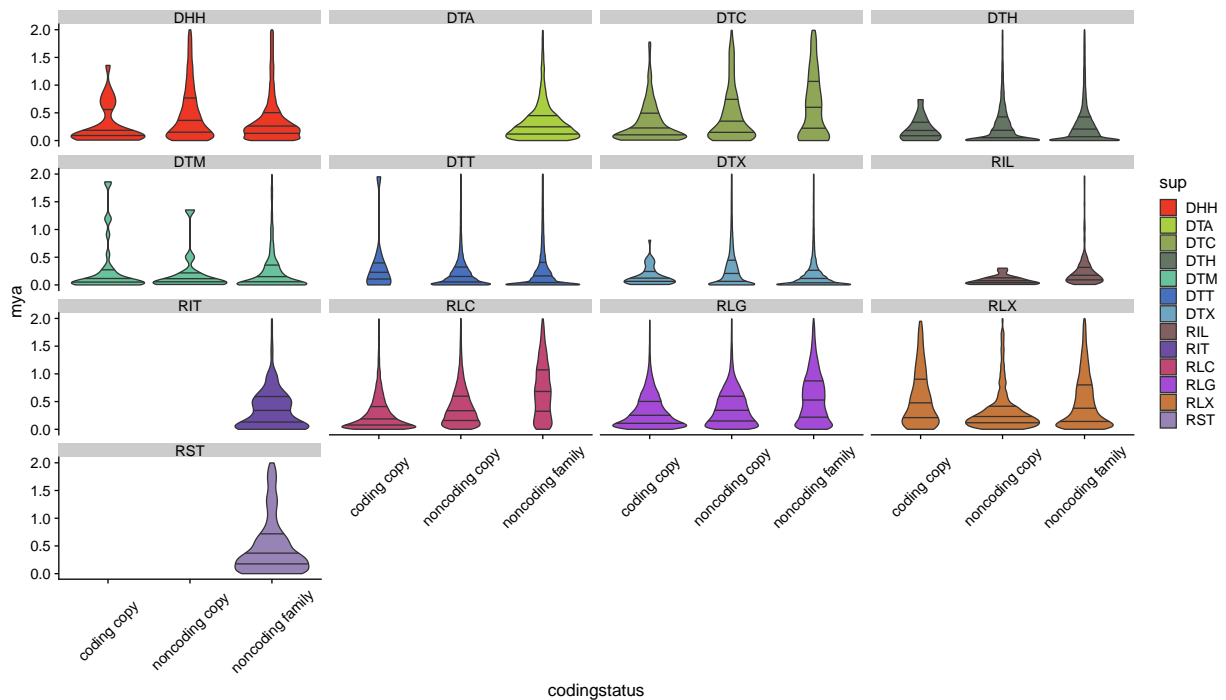

**Fig. S7. Age of TE copies split by coding potential of self and family** Violin plots with three lines, at median and 25th and 75th percentile. Only ages younger than 2 million years are shown. “Coding copy” refers to those copies that code for protein, “noncoding copy” refers to those copies that don't code for protein, but a family member does, and “noncoding family” refers to copies from families without a coding member in B73.

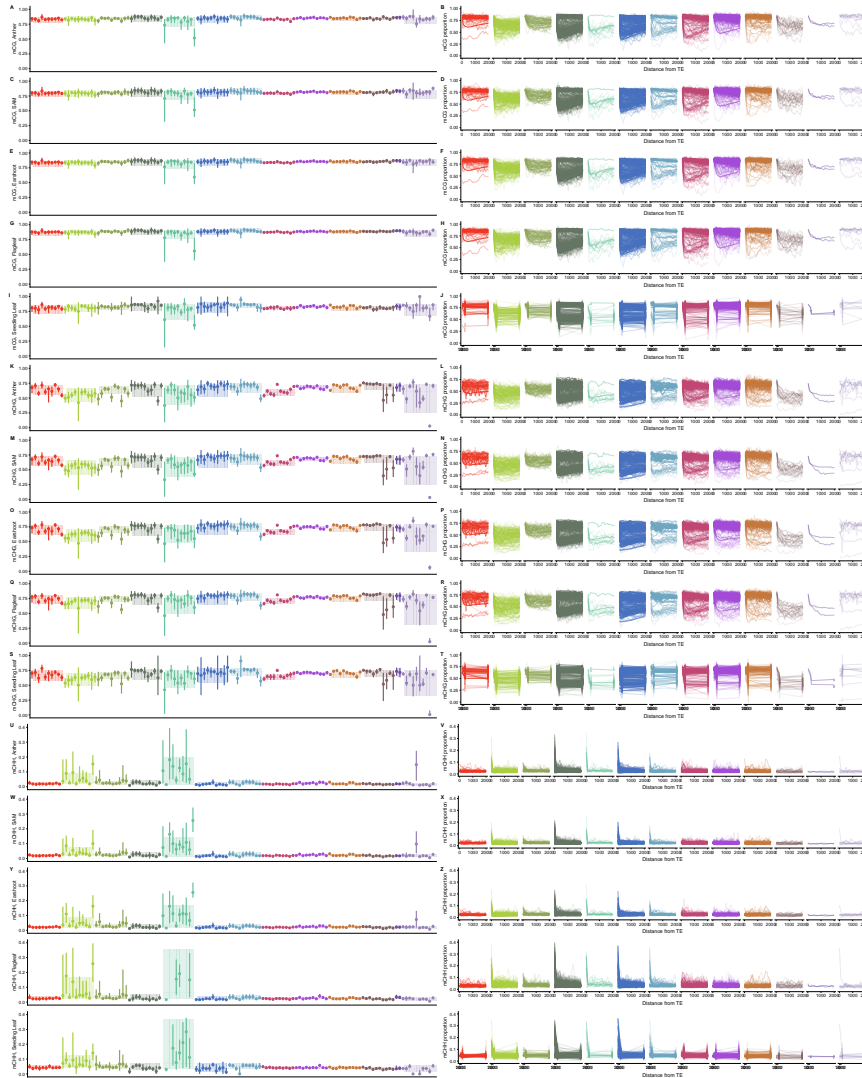

**Fig. S8. Methylation in TE and flanking sequence, across tissues.** A-J: mCG; K-T: mCHG; U-end mCHH. Tissues on y-axis, from top to bottom: Anther, SAM, Earshoot, Flagleaf, Seedling leaf.

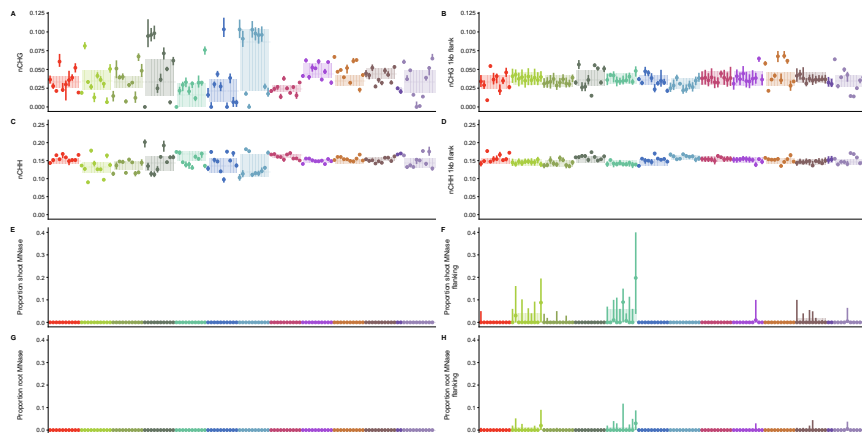

**Fig. S9. Features of the TE and flanking sequences.** Proportion of sites methylatable in CHG context in the TE (A) and 1kb flanking sequence (B), methylatable in the CHH context in the TE (C) and 1kb flanking sequence (D). Proportion of sites in MNase hypersensitive regions in shoot in TE (E) and 1kb flank (F), and root in TE (G) and 1kb flank (H).

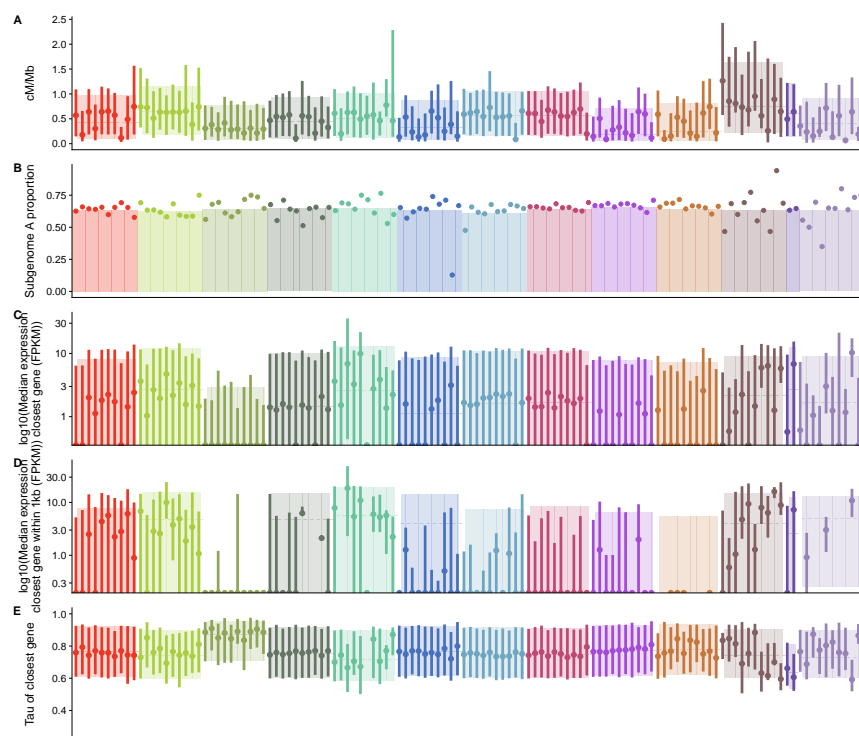

**Fig. S10. Recombination, subgenome, and expression of closest gene.** (A) Recombination rate across the TE, (B) proportion of TEs in subgenome A, (C) median expression of the closest gene to each TE, (D) median expression of genes within 1kb of the TE (E) Tau of closest gene to each TE.

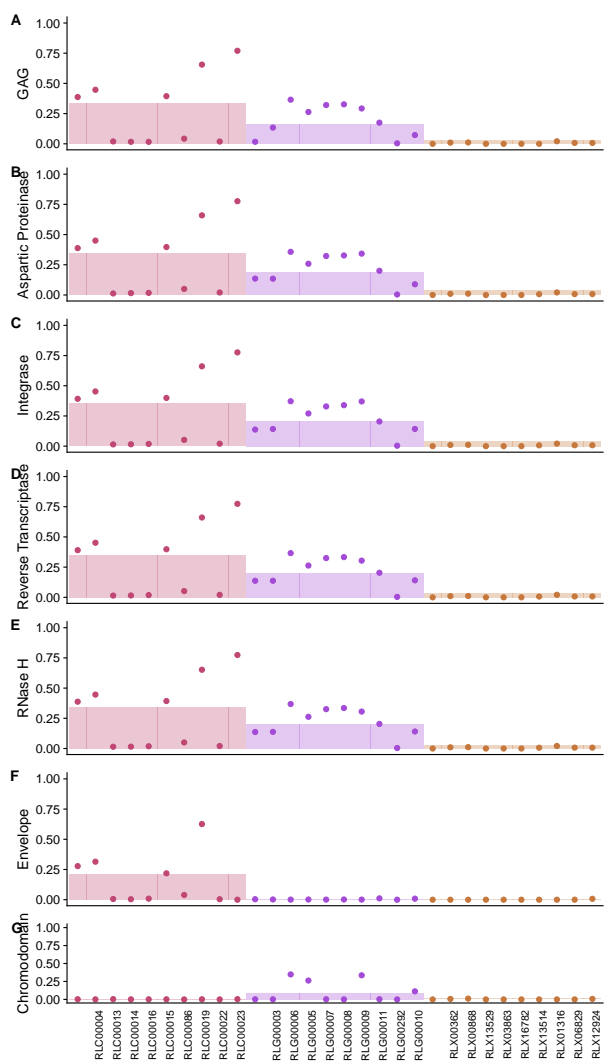

**Fig. S11. Protein coding gene presence of individual LTR GAG and POL domains** Shown are (A) the proportion of TEs with evidence of agglutination factor (GAG) domain present, (B) aspartic proteinase (AP) domains present, (C) Integrase (INT) domains present, (D) reverse transcriptase (RT) domains present, (E) RNaseH domains present, (F) envelope (ENV) domains present, and (G) chromodomain (CHR) domains present. Families are shown as points and superfamily proportions as barplot.

**Table S1.** Categories that each feature is classified into.

| feature          | category                |
|------------------|-------------------------|
| fam              | TE_taxonomy             |
| sup              | TE_taxonomy             |
| closest          | flank_selection         |
| tebp             | TE_features             |
| tespan           | TE_features             |
| pieces           | TE_features             |
| disruptor        | TE_features             |
| ingene           | flank_selection         |
| helprot          | TE_encoded_proteins     |
| rveprot          | TE_encoded_proteins     |
| tpaseprot        | TE_encoded_proteins     |
| GAG              | TE_encoded_proteins     |
| AP               | TE_encoded_proteins     |
| INT              | TE_encoded_proteins     |
| RT               | TE_encoded_proteins     |
| RNaseH           | TE_encoded_proteins     |
| ENV              | TE_encoded_proteins     |
| CHR              | TE_encoded_proteins     |
| pol              | TE_encoded_proteins     |
| auton            | TE_encoded_proteins     |
| GAGfam           | TE_encoded_proteins     |
| APfam            | TE_encoded_proteins     |
| INTfam           | TE_encoded_proteins     |
| RTfam            | TE_encoded_proteins     |
| RNaseHfam        | TE_encoded_proteins     |
| ENVfam           | TE_encoded_proteins     |
| CHRFam           | TE_encoded_proteins     |
| polfam           | TE_encoded_proteins     |
| autonfam         | TE_encoded_proteins     |
| helprotfam       | TE_encoded_proteins     |
| rveprotfam       | TE_encoded_proteins     |
| tpaseprotfam     | TE_encoded_proteins     |
| orfAA            | TE_encoded_proteins     |
| percGC           | TE_base_composition     |
| nCG              | TE_base_composition     |
| nCHG             | TE_base_composition     |
| nCHH             | TE_base_composition     |
| percGC_1kbflank  | flank_base_composition  |
| nCG_1kbflank     | flank_base_composition  |
| nCHG_1kbflank    | flank_base_composition  |
| nCHH_1kbflank    | flank_base_composition  |
| n_root_hs        | TE_methylation_mnase    |
| root_bp          | TE_methylation_mnase    |
| root_prop        | TE_methylation_mnase    |
| n_shoot_hs       | TE_methylation_mnase    |
| shoot_bp         | TE_methylation_mnase    |
| shoot_prop       | TE_methylation_mnase    |
| flank_n_root_hs  | flank_methylation_mnase |
| flank_root_bp    | flank_methylation_mnase |
| flank_root_prop  | flank_methylation_mnase |
| flank_n_shoot_hs | flank_methylation_mnase |
| flank_shoot_bp   | flank_methylation_mnase |
| flank_shoot_prop | flank_methylation_mnase |
| segsites.bp      | TE_features             |







|                         |                         |
|-------------------------|-------------------------|
| earshoot_flank_chh_800  | flank_methylation_mnase |
| earshoot_flank_chh_900  | flank_methylation_mnase |
| earshoot_flank_chh_1000 | flank_methylation_mnase |
| earshoot_flank_chh_1100 | flank_methylation_mnase |
| earshoot_flank_chh_1200 | flank_methylation_mnase |
| earshoot_flank_chh_1300 | flank_methylation_mnase |
| earshoot_flank_chh_1400 | flank_methylation_mnase |
| earshoot_flank_chh_1500 | flank_methylation_mnase |
| earshoot_flank_chh_1600 | flank_methylation_mnase |
| earshoot_flank_chh_1700 | flank_methylation_mnase |
| earshoot_flank_chh_1800 | flank_methylation_mnase |
| earshoot_flank_chh_1900 | flank_methylation_mnase |
| earshoot_flank_chh_2000 | flank_methylation_mnase |
| flagleaf_avg_cg         | TE_methylation_mnase    |
| flagleaf_avg_chg        | TE_methylation_mnase    |
| flagleaf_avg_chh        | TE_methylation_mnase    |
| flagleaf_flank_cg_100   | flank_methylation_mnase |
| flagleaf_flank_cg_200   | flank_methylation_mnase |
| flagleaf_flank_cg_300   | flank_methylation_mnase |
| flagleaf_flank_cg_400   | flank_methylation_mnase |
| flagleaf_flank_cg_500   | flank_methylation_mnase |
| flagleaf_flank_cg_600   | flank_methylation_mnase |
| flagleaf_flank_cg_700   | flank_methylation_mnase |
| flagleaf_flank_cg_800   | flank_methylation_mnase |
| flagleaf_flank_cg_900   | flank_methylation_mnase |
| flagleaf_flank_cg_1000  | flank_methylation_mnase |
| flagleaf_flank_cg_1100  | flank_methylation_mnase |
| flagleaf_flank_cg_1200  | flank_methylation_mnase |
| flagleaf_flank_cg_1300  | flank_methylation_mnase |
| flagleaf_flank_cg_1400  | flank_methylation_mnase |
| flagleaf_flank_cg_1500  | flank_methylation_mnase |
| flagleaf_flank_cg_1600  | flank_methylation_mnase |
| flagleaf_flank_cg_1700  | flank_methylation_mnase |
| flagleaf_flank_cg_1800  | flank_methylation_mnase |
| flagleaf_flank_cg_1900  | flank_methylation_mnase |
| flagleaf_flank_cg_2000  | flank_methylation_mnase |
| flagleaf_flank_chg_100  | flank_methylation_mnase |
| flagleaf_flank_chg_200  | flank_methylation_mnase |
| flagleaf_flank_chg_300  | flank_methylation_mnase |
| flagleaf_flank_chg_400  | flank_methylation_mnase |
| flagleaf_flank_chg_500  | flank_methylation_mnase |
| flagleaf_flank_chg_600  | flank_methylation_mnase |
| flagleaf_flank_chg_700  | flank_methylation_mnase |
| flagleaf_flank_chg_800  | flank_methylation_mnase |
| flagleaf_flank_chg_900  | flank_methylation_mnase |
| flagleaf_flank_chg_1000 | flank_methylation_mnase |
| flagleaf_flank_chg_1100 | flank_methylation_mnase |
| flagleaf_flank_chg_1200 | flank_methylation_mnase |
| flagleaf_flank_chg_1300 | flank_methylation_mnase |
| flagleaf_flank_chg_1400 | flank_methylation_mnase |
| flagleaf_flank_chg_1500 | flank_methylation_mnase |
| flagleaf_flank_chg_1600 | flank_methylation_mnase |
| flagleaf_flank_chg_1700 | flank_methylation_mnase |
| flagleaf_flank_chg_1800 | flank_methylation_mnase |
| flagleaf_flank_chg_1900 | flank_methylation_mnase |
| flagleaf_flank_chg_2000 | flank_methylation_mnase |
| flagleaf_flank_chh_100  | flank_methylation_mnase |



|                     |                         |
|---------------------|-------------------------|
| all3_flank_chg_1600 | flank_methylation_mnase |
| all3_flank_chg_1700 | flank_methylation_mnase |
| all3_flank_chg_1800 | flank_methylation_mnase |
| all3_flank_chg_1900 | flank_methylation_mnase |
| all3_flank_chg_2000 | flank_methylation_mnase |
| all3_flank_chh_100  | flank_methylation_mnase |
| all3_flank_chh_200  | flank_methylation_mnase |
| all3_flank_chh_300  | flank_methylation_mnase |
| all3_flank_chh_400  | flank_methylation_mnase |
| all3_flank_chh_500  | flank_methylation_mnase |
| all3_flank_chh_600  | flank_methylation_mnase |
| all3_flank_chh_700  | flank_methylation_mnase |
| all3_flank_chh_800  | flank_methylation_mnase |
| all3_flank_chh_900  | flank_methylation_mnase |
| all3_flank_chh_1000 | flank_methylation_mnase |
| all3_flank_chh_1100 | flank_methylation_mnase |
| all3_flank_chh_1200 | flank_methylation_mnase |
| all3_flank_chh_1300 | flank_methylation_mnase |
| all3_flank_chh_1400 | flank_methylation_mnase |
| all3_flank_chh_1500 | flank_methylation_mnase |
| all3_flank_chh_1600 | flank_methylation_mnase |
| all3_flank_chh_1700 | flank_methylation_mnase |
| all3_flank_chh_1800 | flank_methylation_mnase |
| all3_flank_chh_1900 | flank_methylation_mnase |
| all3_flank_chh_2000 | flank_methylation_mnase |
| SAM_avg_cg          | TE_methylation_mnase    |
| SAM_avg_chg         | TE_methylation_mnase    |
| SAM_avg_chh         | TE_methylation_mnase    |
| SAM_flank_cg_100    | flank_methylation_mnase |
| SAM_flank_cg_200    | flank_methylation_mnase |
| SAM_flank_cg_300    | flank_methylation_mnase |
| SAM_flank_cg_400    | flank_methylation_mnase |
| SAM_flank_cg_500    | flank_methylation_mnase |
| SAM_flank_cg_600    | flank_methylation_mnase |
| SAM_flank_cg_700    | flank_methylation_mnase |
| SAM_flank_cg_800    | flank_methylation_mnase |
| SAM_flank_cg_900    | flank_methylation_mnase |
| SAM_flank_cg_1000   | flank_methylation_mnase |
| SAM_flank_cg_1100   | flank_methylation_mnase |
| SAM_flank_cg_1200   | flank_methylation_mnase |
| SAM_flank_cg_1300   | flank_methylation_mnase |
| SAM_flank_cg_1400   | flank_methylation_mnase |
| SAM_flank_cg_1500   | flank_methylation_mnase |
| SAM_flank_cg_1600   | flank_methylation_mnase |
| SAM_flank_cg_1700   | flank_methylation_mnase |
| SAM_flank_cg_1800   | flank_methylation_mnase |
| SAM_flank_cg_1900   | flank_methylation_mnase |
| SAM_flank_cg_2000   | flank_methylation_mnase |
| SAM_flank_chg_100   | flank_methylation_mnase |
| SAM_flank_chg_200   | flank_methylation_mnase |
| SAM_flank_chg_300   | flank_methylation_mnase |
| SAM_flank_chg_400   | flank_methylation_mnase |
| SAM_flank_chg_500   | flank_methylation_mnase |
| SAM_flank_chg_600   | flank_methylation_mnase |
| SAM_flank_chg_700   | flank_methylation_mnase |
| SAM_flank_chg_800   | flank_methylation_mnase |
| SAM_flank_chg_900   | flank_methylation_mnase |

|                                               |                               |
|-----------------------------------------------|-------------------------------|
| SAM_flank_chg_1000                            | flank_methylation_mnase       |
| SAM_flank_chg_1100                            | flank_methylation_mnase       |
| SAM_flank_chg_1200                            | flank_methylation_mnase       |
| SAM_flank_chg_1300                            | flank_methylation_mnase       |
| SAM_flank_chg_1400                            | flank_methylation_mnase       |
| SAM_flank_chg_1500                            | flank_methylation_mnase       |
| SAM_flank_chg_1600                            | flank_methylation_mnase       |
| SAM_flank_chg_1700                            | flank_methylation_mnase       |
| SAM_flank_chg_1800                            | flank_methylation_mnase       |
| SAM_flank_chg_1900                            | flank_methylation_mnase       |
| SAM_flank_chg_2000                            | flank_methylation_mnase       |
| SAM_flank_chh_100                             | flank_methylation_mnase       |
| SAM_flank_chh_200                             | flank_methylation_mnase       |
| SAM_flank_chh_300                             | flank_methylation_mnase       |
| SAM_flank_chh_400                             | flank_methylation_mnase       |
| SAM_flank_chh_500                             | flank_methylation_mnase       |
| SAM_flank_chh_600                             | flank_methylation_mnase       |
| SAM_flank_chh_700                             | flank_methylation_mnase       |
| SAM_flank_chh_800                             | flank_methylation_mnase       |
| SAM_flank_chh_900                             | flank_methylation_mnase       |
| SAM_flank_chh_1000                            | flank_methylation_mnase       |
| SAM_flank_chh_1100                            | flank_methylation_mnase       |
| SAM_flank_chh_1200                            | flank_methylation_mnase       |
| SAM_flank_chh_1300                            | flank_methylation_mnase       |
| SAM_flank_chh_1400                            | flank_methylation_mnase       |
| SAM_flank_chh_1500                            | flank_methylation_mnase       |
| SAM_flank_chh_1600                            | flank_methylation_mnase       |
| SAM_flank_chh_1700                            | flank_methylation_mnase       |
| SAM_flank_chh_1800                            | flank_methylation_mnase       |
| SAM_flank_chh_1900                            | flank_methylation_mnase       |
| SAM_flank_chh_2000                            | flank_methylation_mnase       |
| gene_6_7_internode                            | flank_closest_gene_expression |
| gene_7_8_internode                            | flank_closest_gene_expression |
| gene_Vegetative_Meristem_16_19_Day            | flank_closest_gene_expression |
| gene_Ear_Primordium_2_4_mm                    | flank_closest_gene_expression |
| gene_Ear_Primordium_6_8_mm                    | flank_closest_gene_expression |
| gene_Embryo_20_DAP                            | flank_closest_gene_expression |
| gene_Embryo_38_DAP                            | flank_closest_gene_expression |
| gene_Endosperm_12_DAP                         | flank_closest_gene_expression |
| gene_Endosperm_Crown_27_DAP                   | flank_closest_gene_expression |
| gene_Germinatin_Kernels_2_DAI                 | flank_closest_gene_expression |
| gene_Pericarp_Aleurone_27_DAP                 | flank_closest_gene_expression |
| gene_Leaf_Zone_1_Symmetrical_                 | flank_closest_gene_expression |
| gene_Leaf_Zone_2_Stomatal_                    | flank_closest_gene_expression |
| gene_Leaf_Zone_3_Growth_                      | flank_closest_gene_expression |
| gene_Mature_Leaf_8                            | flank_closest_gene_expression |
| gene_Primary_Root_5_Days                      | flank_closest_gene_expression |
| gene_Root_Cortex_5_Days                       | flank_closest_gene_expression |
| gene_Root_Elongation_Zone_5_Days              | flank_closest_gene_expression |
| gene_Root_Meristem_Zone_5_Days                | flank_closest_gene_expression |
| gene_Secondary_Root_7_8_Days                  | flank_closest_gene_expression |
| gene_B73_Mature_Pollen                        | flank_closest_gene_expression |
| gene_Female_Spikelet_Collected_on_day_as_silk | flank_closest_gene_expression |
| gene_Silk                                     | flank_closest_gene_expression |
| famsize                                       | TE_features                   |
| gene_coefvar                                  | flank_closest_gene_expression |
| gene_median                                   | flank_closest_gene_expression |

|                              |                 |
|------------------------------|-----------------|
| Tefam_ear_primordium.2mm     | TE_expression   |
| Tefam_ear_primordium.6mm     | TE_expression   |
| Tefam_embryo_20d             | TE_expression   |
| Tefam_embryo_38d             | TE_expression   |
| Tefam_endosperm_12d          | TE_expression   |
| Tefam_endosperm_crown        | TE_expression   |
| Tefam_germinating.kernels_2d | TE_expression   |
| Tefam_internode_6to7         | TE_expression   |
| Tefam_internode_7to8         | TE_expression   |
| Tefam_leaf_8                 | TE_expression   |
| Tefam_leaf_growth.zone       | TE_expression   |
| Tefam_leaf_stomatal.zone     | TE_expression   |
| Tefam_leaf_symmetrical.zone  | TE_expression   |
| Tefam_meristem_vegetative    | TE_expression   |
| Tefam_pollen_mature          | TE_expression   |
| Tefam_root_cortex            | TE_expression   |
| Tefam_root_elongation.zone   | TE_expression   |
| Tefam_root_meristem.zone     | TE_expression   |
| Tefam_root_primary           | TE_expression   |
| Tefam_root_secondary         | TE_expression   |
| Tefam_seed_pericarp.aleurone | TE_expression   |
| Tefam_silk_mature            | TE_expression   |
| Tefam_spikelet_female        | TE_expression   |
| TefamMedian                  | TE_expression   |
| TefamMedianPerCopy           | TE_expression   |
| TefamMedianPerBp             | TE_expression   |
| Tefam_tau                    | TE_expression   |
| cmmb                         | flank_selection |
| subgenome                    | flank_selection |

**Table S2.** 14 families with at least 10 copies in the B73 genome, with at least 75% of copies coding for transposition related proteins.

| sup | fam      | propAuton          | famsize | medianORF | meanORF           |
|-----|----------|--------------------|---------|-----------|-------------------|
| DTC | DTC00001 | 0.773399014778325  | 203     | 614       | 591.751269035533  |
| DTC | DTC00014 | 0.8333333333333333 | 12      | 678       | 635.75            |
| DTC | DTC00017 | 0.9                | 10      | 448       | 453.2             |
| DTC | DTC00027 | 0.9                | 20      | 571.5     | 580.1             |
| DTC | DTC00041 | 0.8                | 10      | 388       | 407.4             |
| DTC | DTC00053 | 0.75               | 28      | 745.5     | 724.821428571429  |
| DTC | DTC00063 | 0.75               | 12      | 495.5     | 480.916666666667  |
| RLC | RLC00023 | 0.76878612716763   | 519     | 992       | 941.737769080235  |
| RLC | RLC00074 | 0.765625           | 64      | 901.5     | 928.3125          |
| RLC | RLC00137 | 0.857142857142857  | 28      | 1287.5    | 1072.78571428571  |
| RLC | RLC00149 | 0.777777777777778  | 27      | 1253      | 1103.111111111111 |
| RLC | RLC00158 | 0.8                | 25      | 769       | 894.84            |
| RLC | RLC00232 | 0.882352941176471  | 17      | 1473      | 1147.17647058824  |
| RLC | RLC00252 | 0.8                | 15      | 1112      | 1163.26666666667  |
| RLC | RLC00305 | 0.909090909090909  | 11      | 1008      | 1009.63636363636  |
| RLC | RLC00367 | 0.9                | 10      | 1616.5    | 1404.8            |
| RLG | RLG00287 | 0.846153846153846  | 13      | 1173      | 1101.38461538462  |
| RLG | RLG00363 | 0.8                | 10      | 1442      | 1235.9            |

**Table S3.** 842 families with at least 10 copies in the B73 genome that lack coding representatives.

| sup | fam | propAuton | famsize | medianORF | meanORF |
|-----|-----|-----------|---------|-----------|---------|
|-----|-----|-----------|---------|-----------|---------|

|     |          |   |      |       |                  |
|-----|----------|---|------|-------|------------------|
| DHH | DHH00001 | 0 | 5946 | 69    | 170.178694158076 |
| DHH | DHH00003 | 0 | 949  | 541   | 521.511956521739 |
| DHH | DHH00004 | 0 | 1611 | 369   | 347.998137802607 |
| DHH | DHH00005 | 0 | 265  | 221   | 295.777777777778 |
| DHH | DHH00006 | 0 | 1013 | 79    | 77.5364705882353 |
| DHH | DHH00007 | 0 | 403  | 202.5 | 238.27380952381  |
| DHH | DHH00008 | 0 | 738  | 739   | 651.770065075922 |
| DHH | DHH00009 | 0 | 283  | 250   | 276.218637992832 |
| DHH | DHH00011 | 0 | 81   | 225   | 266.012345679012 |
| DHH | DHH00012 | 0 | 164  | 226.5 | 248.440789473684 |
| DHH | DHH00013 | 0 | 156  | 67    | 145.893203883495 |
| DHH | DHH00014 | 0 | 90   | 402   | 446.134831460674 |
| DHH | DHH00015 | 0 | 119  | 68    | 129.794392523364 |
| DHH | DHH00016 | 0 | 149  | 61    | 90.4491525423729 |
| DHH | DHH00017 | 0 | 29   | 331   | 325.655172413793 |
| DHH | DHH00018 | 0 | 62   | 988   | 890.947368421053 |
| DHH | DHH00019 | 0 | 110  | 44.5  | 133.735294117647 |
| DHH | DHH00020 | 0 | 25   | 232   | 306              |
| DHH | DHH00021 | 0 | 51   | 388   | 413.392156862745 |
| DHH | DHH00022 | 0 | 35   | 192   | 281.318181818182 |
| DHH | DHH00023 | 0 | 46   | 253   | 227.673913043478 |
| DHH | DHH00024 | 0 | 40   | 49    | 74.4054054054054 |
| DHH | DHH00025 | 0 | 63   | 121.5 | 258.648148148148 |
| DHH | DHH00026 | 0 | 36   | 135   | 149.852941176471 |
| DHH | DHH00027 | 0 | 14   | 64    | 203              |
| DHH | DHH00028 | 0 | 12   | 218.5 | 319.416666666667 |
| DHH | DHH00029 | 0 | 75   | 179   | 242.808219178082 |
| DHH | DHH00030 | 0 | 18   | 322   | 269.470588235294 |
| DHH | DHH00032 | 0 | 68   | 197   | 239.754098360656 |
| DHH | DHH00036 | 0 | 21   | 1303  | 1193.04761904762 |
| DHH | DHH00037 | 0 | 16   | 221   | 281.933333333333 |
| DHH | DHH00038 | 0 | 11   | 142   | 214.555555555556 |
| DHH | DHH00040 | 0 | 16   | 306   | 374.4            |
| DHH | DHH00041 | 0 | 16   | 128.5 | 184              |
| DHH | DHH00043 | 0 | 18   | 146.5 | 173.777777777778 |
| DHH | DHH00044 | 0 | 15   | 109.5 | 130.214285714286 |
| DHH | DHH00045 | 0 | 10   | 81    | 147.714285714286 |
| DHH | DHH00048 | 0 | 24   | 146   | 151.434782608696 |
| DHH | DHH00049 | 0 | 17   | 362   | 318.714285714286 |
| DHH | DHH00050 | 0 | 15   | 54    | 120.142857142857 |
| DHH | DHH00052 | 0 | 13   | 555   | 478.666666666667 |
| DHH | DHH00059 | 0 | 11   | 83.5  | 93.5             |
| DHH | DHH00063 | 0 | 10   | 122   | 94.1111111111111 |
| DTA | DTA00003 | 0 | 12   | 74    | 74               |
| DTA | DTA00006 | 0 | 12   | 306   | 308.75           |
| DTA | DTA00016 | 0 | 10   | 315   | 322              |
| DTA | DTA00025 | 0 | 13   | 445   | 405.692307692308 |
| DTA | DTA00029 | 0 | 12   | 307.5 | 386.166666666667 |
| DTA | DTA00030 | 0 | 16   | 345   | 383.8125         |
| DTA | DTA00040 | 0 | 36   | 36    | 36.9285714285714 |
| DTA | DTA00045 | 0 | 23   | 43    | 46.25            |
| DTA | DTA00046 | 0 | 19   | 27    | 42.8333333333333 |
| DTA | DTA00049 | 0 | 38   | 30    | 58.4285714285714 |
| DTA | DTA00051 | 0 | 42   | 39.5  | 86.6666666666667 |
| DTA | DTA00059 | 0 | 12   | 51    | 48.1111111111111 |
| DTA | DTA00060 | 0 | 120  | 33    | 131.263157894737 |

|     |          |   |     |       |                  |
|-----|----------|---|-----|-------|------------------|
| DTA | DTA00061 | 0 | 54  | 20    | 54.8             |
| DTA | DTA00062 | 0 | 10  | 131   | 131              |
| DTA | DTA00064 | 0 | 19  | 104   | 161.333333333333 |
| DTA | DTA00065 | 0 | 19  | 37    | 42.5             |
| DTA | DTA00066 | 0 | 35  | 29.5  | 33.7             |
| DTA | DTA00073 | 0 | 148 | 49.5  | 46.25            |
| DTA | DTA00076 | 0 | 55  | 42    | 42               |
| DTA | DTA00077 | 0 | 15  | 433   | 432.727272727273 |
| DTA | DTA00078 | 0 | 26  | 35    | 30.625           |
| DTA | DTA00080 | 0 | 72  | 106   | 129.1875         |
| DTA | DTA00085 | 0 | 15  | 417   | 455.6            |
| DTA | DTA00089 | 0 | 19  | 87.5  | 101.75           |
| DTA | DTA00090 | 0 | 23  | 84    | 169.285714285714 |
| DTA | DTA00091 | 0 | 30  | 86    | 95.6923076923077 |
| DTA | DTA00092 | 0 | 70  | 26    | 102.454545454545 |
| DTA | DTA00099 | 0 | 19  | 65    | 88.4             |
| DTA | DTA00102 | 0 | 157 | 29.5  | 37.5853658536585 |
| DTA | DTA00104 | 0 | 36  | 90    | 286              |
| DTA | DTA00106 | 0 | 31  | 58.5  | 134.230769230769 |
| DTA | DTA00114 | 0 | 147 | 65    | 79.5365853658537 |
| DTA | DTA00115 | 0 | 12  | 94.5  | 219.25           |
| DTA | DTA00117 | 0 | 234 | 31.5  | 40.3809523809524 |
| DTA | DTA00118 | 0 | 11  | 33    | 355.333333333333 |
| DTA | DTA00119 | 0 | 80  | NA    | NaN              |
| DTA | DTA00120 | 0 | 25  | 88    | 137.714285714286 |
| DTA | DTA00124 | 0 | 13  | 41    | 41               |
| DTA | DTA00126 | 0 | 20  | 24    | 24               |
| DTA | DTA00131 | 0 | 46  | 88    | 101.555555555556 |
| DTA | DTA00133 | 0 | 14  | 82    | 95               |
| DTA | DTA00135 | 0 | 132 | 56    | 53.8064516129032 |
| DTA | DTA00136 | 0 | 40  | 131   | 156.782608695652 |
| DTA | DTA00138 | 0 | 15  | 78    | 95               |
| DTA | DTA00141 | 0 | 192 | 43    | 50.8             |
| DTA | DTA00142 | 0 | 16  | 47    | 51               |
| DTA | DTA00143 | 0 | 35  | 36    | 42.5             |
| DTA | DTA00144 | 0 | 24  | 48.5  | 54               |
| DTA | DTA00148 | 0 | 10  | 58    | 118.8            |
| DTA | DTA00149 | 0 | 58  | 20    | 47.3529411764706 |
| DTA | DTA00151 | 0 | 20  | 47    | 97.3333333333333 |
| DTA | DTA00152 | 0 | 17  | 60    | 56.75            |
| DTA | DTA00153 | 0 | 11  | 19    | 19               |
| DTA | DTA00154 | 0 | 14  | 609.5 | 512.25           |
| DTA | DTA00155 | 0 | 27  | 87    | 115.117647058824 |
| DTA | DTA00156 | 0 | 22  | 55    | 52.4             |
| DTA | DTA00159 | 0 | 11  | 110   | 101.142857142857 |
| DTA | DTA00164 | 0 | 10  | 69    | 146.285714285714 |
| DTA | DTA00167 | 0 | 11  | 254   | 254              |
| DTA | DTA00169 | 0 | 12  | 41    | 40.3333333333333 |
| DTA | DTA00171 | 0 | 38  | 38    | 90.5             |
| DTA | DTA00172 | 0 | 263 | 25    | 26.6338028169014 |
| DTA | DTA00174 | 0 | 18  | 21    | 31               |
| DTA | DTA00179 | 0 | 19  | 25    | 25               |
| DTA | DTA00180 | 0 | 16  | NA    | NaN              |
| DTA | DTA00186 | 0 | 46  | 23    | 26.2             |
| DTA | DTA00191 | 0 | 17  | 20.5  | 20.5             |
| DTA | DTA00192 | 0 | 84  | 76    | 81.5806451612903 |
| DTA | DTA00194 | 0 | 56  | 61    | 64.6666666666667 |

|     |          |   |     |       |                  |
|-----|----------|---|-----|-------|------------------|
| DTA | DTA00199 | 0 | 13  | 121.5 | 231.5            |
| DTA | DTA00204 | 0 | 68  | 37.5  | 37.5             |
| DTA | DTA00210 | 0 | 88  | NA    | NaN              |
| DTA | DTA00217 | 0 | 77  | 22    | 35.9             |
| DTA | DTA00219 | 0 | 11  | NA    | NaN              |
| DTA | DTA00224 | 0 | 13  | 84    | 96               |
| DTA | DTA00227 | 0 | 13  | 29    | 30.6             |
| DTA | DTA00238 | 0 | 19  | NA    | NaN              |
| DTA | DTA00239 | 0 | 17  | 33.5  | 33.5             |
| DTA | DTA00242 | 0 | 11  | 82.5  | 72               |
| DTA | DTA00243 | 0 | 13  | NA    | NaN              |
| DTA | DTA00245 | 0 | 28  | 138   | 297.8            |
| DTA | DTA00249 | 0 | 11  | NA    | NaN              |
| DTA | DTA00252 | 0 | 89  | 65    | 53.551724137931  |
| DTA | DTA00253 | 0 | 34  | 28    | 58.48            |
| DTA | DTA00256 | 0 | 15  | 461.5 | 406.166666666667 |
| DTA | DTA00267 | 0 | 11  | 23    | 37.1428571428571 |
| DTA | DTA00283 | 0 | 17  | 33    | 34.3333333333333 |
| DTA | DTA00286 | 0 | 17  | 27    | 30.9             |
| DTA | DTA00289 | 0 | 11  | 26    | 71.8             |
| DTA | DTA00291 | 0 | 42  | 39    | 50.9230769230769 |
| DTA | DTA00293 | 0 | 29  | 64    | 53.1578947368421 |
| DTA | DTA00295 | 0 | 16  | 28    | 25.3333333333333 |
| DTA | DTA00299 | 0 | 23  | NA    | NaN              |
| DTA | DTA00301 | 0 | 11  | 33    | 105.4            |
| DTA | DTA00307 | 0 | 62  | 25    | 30.2             |
| DTA | DTA00312 | 0 | 18  | 59    | 72.5             |
| DTA | DTA00313 | 0 | 11  | NA    | NaN              |
| DTA | DTA00323 | 0 | 16  | 25    | 34.5             |
| DTA | DTA00339 | 0 | 12  | 45.5  | 45.5             |
| DTA | DTA00345 | 0 | 16  | 22    | 22               |
| DTA | DTA00346 | 0 | 11  | 48    | 48               |
| DTA | DTA00348 | 0 | 15  | NA    | NaN              |
| DTA | DTA00383 | 0 | 79  | 29    | 28.1428571428571 |
| DTA | DTA13185 | 0 | 35  | 43    | 42.9333333333333 |
| DTC | DTC00109 | 0 | 10  | 39    | 44.4             |
| DTC | DTC00111 | 0 | 228 | 32    | 35.2894736842105 |
| DTC | DTC00112 | 0 | 67  | 32    | 40.2857142857143 |
| DTC | DTC00113 | 0 | 61  | 87.5  | 94.8125          |
| DTC | DTC00114 | 0 | 86  | 29    | 31.4444444444444 |
| DTC | DTC00115 | 0 | 20  | 37.5  | 58.75            |
| DTC | DTC00116 | 0 | 80  | 40.5  | 42.6666666666667 |
| DTC | DTC00118 | 0 | 79  | 24    | 35.0645161290323 |
| DTC | DTC00122 | 0 | 143 | 42    | 49.3695652173913 |
| DTC | DTC00126 | 0 | 10  | NA    | NaN              |
| DTC | DTC10850 | 0 | 15  | 30    | 32               |
| DTC | DTC12155 | 0 | 62  | 29    | 28.4090909090909 |
| DTC | DTC15669 | 0 | 14  | 35    | 43               |
| DTH | DTH00004 | 0 | 11  | 345   | 322.181818181818 |
| DTH | DTH00010 | 0 | 17  | 344   | 302.882352941176 |
| DTH | DTH00011 | 0 | 11  | 251   | 255.363636363636 |
| DTH | DTH00012 | 0 | 11  | 198   | 167.272727272727 |
| DTH | DTH00015 | 0 | 10  | 418   | 397.6            |
| DTH | DTH00024 | 0 | 17  | 186   | 279.058823529412 |
| DTH | DTH00032 | 0 | 11  | 219   | 238.636363636364 |
| DTH | DTH00037 | 0 | 97  | 35    | 40.2631578947368 |
| DTH | DTH00040 | 0 | 48  | 39    | 44.1666666666667 |



|     |          |   |      |      |                  |
|-----|----------|---|------|------|------------------|
| DTH | DTH00041 | 0 | 21   | 69   | 67.8571428571429 |
| DTH | DTH00042 | 0 | 11   | 29   | 33               |
| DTH | DTH00043 | 0 | 15   | 46.5 | 46.5             |
| DTH | DTH00044 | 0 | 20   | 43   | 44.3333333333333 |
| DTH | DTH00046 | 0 | 13   | 43   | 52.25            |
| DTH | DTH00049 | 0 | 46   | 28   | 44.8333333333333 |
| DTH | DTH00050 | 0 | 16   | 36   | 47               |
| DTH | DTH00051 | 0 | 27   | 118  | 134.714285714286 |
| DTH | DTH00053 | 0 | 10   | NA   | NaN              |
| DTH | DTH00054 | 0 | 190  | 34   | 40.1351351351351 |
| DTH | DTH00057 | 0 | 181  | 67   | 58.7205882352941 |
| DTH | DTH00058 | 0 | 72   | 63   | 84.2             |
| DTH | DTH00062 | 0 | 29   | 27   | 26               |
| DTH | DTH00067 | 0 | 602  | 36   | 65.5             |
| DTH | DTH00071 | 0 | 11   | NA   | NaN              |
| DTH | DTH00073 | 0 | 122  | 42   | 128.777777777778 |
| DTH | DTH00076 | 0 | 29   | 45   | 50.0909090909091 |
| DTH | DTH00084 | 0 | 10   | 57   | 54               |
| DTH | DTH00090 | 0 | 214  | 32   | 35.4545454545455 |
| DTH | DTH00093 | 0 | 65   | 21   | 24               |
| DTH | DTH00098 | 0 | 495  | 26   | 29.0246305418719 |
| DTH | DTH00102 | 0 | 1291 | 44   | 40.5723684210526 |
| DTH | DTH00114 | 0 | 25   | 46   | 52.5             |
| DTH | DTH00118 | 0 | 397  | 37   | 41.1511627906977 |
| DTH | DTH00119 | 0 | 124  | 29   | 31.8235294117647 |
| DTH | DTH00127 | 0 | 164  | 25   | 30.6923076923077 |
| DTH | DTH00129 | 0 | 86   | 31   | 35.3636363636364 |
| DTH | DTH00135 | 0 | 38   | 34   | 40.2727272727273 |
| DTH | DTH00139 | 0 | 125  | 30   | 31.1315789473684 |
| DTH | DTH00145 | 0 | 19   | 46   | 46.3333333333333 |
| DTH | DTH00153 | 0 | 93   | 24   | 27.5             |
| DTH | DTH00154 | 0 | 606  | 33   | 34.3125          |
| DTH | DTH00160 | 0 | 196  | 35   | 37.2962962962963 |
| DTH | DTH00162 | 0 | 72   | 79   | 125.8            |
| DTH | DTH00163 | 0 | 968  | 38   | 34.8842105263158 |
| DTH | DTH00178 | 0 | 10   | 38.5 | 38.5             |
| DTH | DTH00180 | 0 | 16   | 34   | 33.1666666666667 |
| DTH | DTH00181 | 0 | 44   | 40.5 | 42.75            |
| DTH | DTH00184 | 0 | 26   | 42   | 39.0588235294118 |
| DTH | DTH00194 | 0 | 118  | 38   | 55.0618556701031 |
| DTH | DTH00198 | 0 | 17   | 54   | 54               |
| DTH | DTH00202 | 0 | 44   | 29   | 42.6             |
| DTH | DTH00220 | 0 | 10   | 42   | 40.7             |
| DTH | DTH00226 | 0 | 40   | 40   | 41               |
| DTH | DTH00233 | 0 | 292  | 33   | 38.804347826087  |
| DTH | DTH00241 | 0 | 35   | 39.5 | 39.5             |
| DTH | DTH00244 | 0 | 11   | 30   | 30               |
| DTH | DTH00273 | 0 | 11   | 34   | 84.6666666666667 |
| DTH | DTH00280 | 0 | 289  | 53   | 50.9074074074074 |
| DTH | DTH00292 | 0 | 10   | 116  | 116              |
| DTH | DTH00307 | 0 | 20   | NA   | NaN              |
| DTH | DTH00311 | 0 | 79   | 53   | 68.75            |
| DTH | DTH00314 | 0 | 10   | NA   | NaN              |
| DTH | DTH00320 | 0 | 95   | 23   | 27.4             |
| DTH | DTH00326 | 0 | 56   | 33   | 33               |
| DTH | DTH00327 | 0 | 481  | 40   | 60.0769230769231 |
| DTH | DTH00335 | 0 | 32   | 21   | 21.7272727272727 |

|     |          |   |      |       |                   |
|-----|----------|---|------|-------|-------------------|
| DTH | DTH00337 | 0 | 75   | 32    | 64.4              |
| DTH | DTH00340 | 0 | 27   | 49    | 47.93333333333333 |
| DTH | DTH00347 | 0 | 14   | 124   | 110.2             |
| DTH | DTH00351 | 0 | 153  | 26.5  | 32.25             |
| DTH | DTH00355 | 0 | 67   | 44.5  | 47.875            |
| DTH | DTH00361 | 0 | 85   | 27    | 36.125            |
| DTH | DTH00364 | 0 | 76   | 43    | 51.0869565217391  |
| DTH | DTH00367 | 0 | 10   | 60.5  | 60.5              |
| DTH | DTH00382 | 0 | 13   | 24    | 24.5              |
| DTH | DTH00385 | 0 | 82   | 22.5  | 28.85             |
| DTH | DTH00389 | 0 | 212  | 26    | 34.48             |
| DTH | DTH00409 | 0 | 748  | 27    | 55.68             |
| DTH | DTH00410 | 0 | 76   | 20    | 30.66666666666667 |
| DTH | DTH00412 | 0 | 52   | 215.5 | 178.6666666666667 |
| DTH | DTH00418 | 0 | 111  | 39    | 44.4705882352941  |
| DTH | DTH00431 | 0 | 74   | 43    | 42.86666666666667 |
| DTH | DTH00434 | 0 | 347  | 27    | 44.45454545454545 |
| DTH | DTH00437 | 0 | 152  | 49    | 60.1071428571429  |
| DTH | DTH00442 | 0 | 74   | 36    | 55                |
| DTH | DTH00453 | 0 | 18   | 31.5  | 31.5              |
| DTH | DTH00460 | 0 | 81   | 37    | 30.4              |
| DTH | DTH00463 | 0 | 18   | 33    | 33                |
| DTH | DTH00471 | 0 | 42   | 32    | 99.33333333333333 |
| DTH | DTH00485 | 0 | 58   | 37.5  | 40                |
| DTH | DTH00486 | 0 | 16   | 21    | 21                |
| DTH | DTH00489 | 0 | 99   | 23    | 27.1428571428571  |
| DTH | DTH10044 | 0 | 86   | 40    | 41.75             |
| DTH | DTH10047 | 0 | 169  | 30.5  | 42.9375           |
| DTH | DTH10048 | 0 | 13   | 52.5  | 50.75             |
| DTH | DTH10060 | 0 | 11   | 34.5  | 37.25             |
| DTH | DTH10064 | 0 | 28   | 20    | 20                |
| DTH | DTH10085 | 0 | 20   | 44    | 53.5714285714286  |
| DTH | DTH10107 | 0 | 290  | 44    | 45.2631578947368  |
| DTH | DTH10113 | 0 | 37   | 45    | 45                |
| DTH | DTH10153 | 0 | 61   | 43    | 43.5454545454545  |
| DTH | DTH10158 | 0 | 98   | 29    | 55.4090909090909  |
| DTH | DTH10176 | 0 | 146  | 32    | 38.9245283018868  |
| DTH | DTH10182 | 0 | 26   | 27.5  | 46                |
| DTH | DTH10187 | 0 | 80   | 29    | 29.1153846153846  |
| DTH | DTH10226 | 0 | 15   | 31    | 33                |
| DTH | DTH10230 | 0 | 107  | 28    | 30.3888888888889  |
| DTH | DTH10239 | 0 | 25   | 41    | 43.25             |
| DTH | DTH10248 | 0 | 21   | 26.5  | 33                |
| DTH | DTH10268 | 0 | 516  | 46    | 42.5354838709677  |
| DTH | DTH10298 | 0 | 21   | 33.5  | 33.8333333333333  |
| DTH | DTH10310 | 0 | 106  | 42    | 40.4390243902439  |
| DTH | DTH10314 | 0 | 13   | 44    | 46.75             |
| DTH | DTH10328 | 0 | 82   | 40.5  | 37.9705882352941  |
| DTH | DTH10339 | 0 | 13   | 38    | 36.5555555555556  |
| DTH | DTH10363 | 0 | 1053 | 41    | 39.4405594405594  |
| DTH | DTH10364 | 0 | 36   | 34    | 41.7857142857143  |
| DTH | DTH10379 | 0 | 42   | 35    | 36.6153846153846  |
| DTH | DTH10380 | 0 | 33   | 31.5  | 36.7777777777778  |
| DTH | DTH10388 | 0 | 43   | 41.5  | 52.75             |
| DTH | DTH10391 | 0 | 13   | 26    | 33.3333333333333  |
| DTH | DTH10406 | 0 | 20   | 28    | 38                |
| DTH | DTH10440 | 0 | 14   | 37    | 37                |

|     |          |   |      |       |                  |
|-----|----------|---|------|-------|------------------|
| DTH | DTH10442 | 0 | 25   | 36    | 36.8571428571429 |
| DTH | DTH10444 | 0 | 959  | 31    | 31.5714285714286 |
| DTH | DTH10445 | 0 | 312  | 30    | 52.3333333333333 |
| DTH | DTH10454 | 0 | 44   | 45    | 52.8421052631579 |
| DTH | DTH10481 | 0 | 16   | 38    | 40.7777777777778 |
| DTH | DTH10483 | 0 | 180  | 27    | 37.6727272727273 |
| DTH | DTH10494 | 0 | 17   | 39    | 43.4285714285714 |
| DTH | DTH10560 | 0 | 30   | 42.5  | 48.5             |
| DTH | DTH10573 | 0 | 104  | 35    | 36.3103448275862 |
| DTH | DTH10659 | 0 | 10   | NA    | NaN              |
| DTH | DTH10699 | 0 | 10   | 32    | 30.4             |
| DTH | DTH10700 | 0 | 368  | 33    | 33.4689655172414 |
| DTH | DTH10715 | 0 | 86   | 34    | 33.5471698113208 |
| DTH | DTH10741 | 0 | 10   | 31    | 31               |
| DTH | DTH10775 | 0 | 910  | 134   | 128.749152542373 |
| DTH | DTH10781 | 0 | 12   | 44.5  | 42.25            |
| DTH | DTH10818 | 0 | 14   | 31    | 31               |
| DTH | DTH10852 | 0 | 15   | 34    | 34               |
| DTH | DTH10855 | 0 | 659  | 28    | 29.8343558282209 |
| DTH | DTH10856 | 0 | 126  | 28    | 31.3870967741935 |
| DTH | DTH10946 | 0 | 179  | 25    | 30.0425531914894 |
| DTH | DTH11074 | 0 | 33   | 35    | 41.1111111111111 |
| DTH | DTH11101 | 0 | 409  | 21    | 26.9003984063745 |
| DTH | DTH11152 | 0 | 1624 | 34    | 54.9435431537962 |
| DTH | DTH11199 | 0 | 93   | 52    | 58.3793103448276 |
| DTH | DTH11200 | 0 | 52   | 50    | 58.7894736842105 |
| DTH | DTH11203 | 0 | 513  | 74    | 78               |
| DTH | DTH11206 | 0 | 176  | 135.5 | 141.850574712644 |
| DTH | DTH11207 | 0 | 245  | 123   | 118.725738396624 |
| DTH | DTH11208 | 0 | 187  | 38    | 43.7260273972603 |
| DTH | DTH11209 | 0 | 107  | 44    | 53.6944444444444 |
| DTH | DTH11211 | 0 | 13   | 38    | 44               |
| DTH | DTH11238 | 0 | 894  | 38    | 45.7435897435897 |
| DTH | DTH11239 | 0 | 1029 | 37    | 42.6699029126214 |
| DTH | DTH11253 | 0 | 30   | 20    | 20               |
| DTH | DTH11350 | 0 | 75   | 46    | 52.8125          |
| DTH | DTH11351 | 0 | 29   | 19    | 49.25            |
| DTH | DTH11388 | 0 | 16   | 31.5  | 37.875           |
| DTH | DTH11403 | 0 | 79   | 44    | 42.4210526315789 |
| DTH | DTH11404 | 0 | 10   | 37.5  | 37               |
| DTH | DTH11419 | 0 | 172  | 45    | 41.1692307692308 |
| DTH | DTH11440 | 0 | 10   | 49    | 49               |
| DTH | DTH11441 | 0 | 28   | 25    | 27.3333333333333 |
| DTH | DTH11449 | 0 | 935  | 90    | 80.3986784140969 |
| DTH | DTH11450 | 0 | 449  | 90    | 79.4233409610984 |
| DTH | DTH11457 | 0 | 64   | 62    | 69.7924528301887 |
| DTH | DTH11481 | 0 | 35   | 21.5  | 21.5             |
| DTH | DTH11482 | 0 | 24   | 29.5  | 28               |
| DTH | DTH11541 | 0 | 464  | 83    | 77.7443365695793 |
| DTH | DTH11542 | 0 | 567  | 77    | 78.0234741784038 |
| DTH | DTH11594 | 0 | 65   | 19    | 19.2727272727273 |
| DTH | DTH11602 | 0 | 73   | 38    | 39.4358974358974 |
| DTH | DTH11614 | 0 | 14   | 53    | 53.2             |
| DTH | DTH11708 | 0 | 1556 | 111   | 105.549578742709 |
| DTH | DTH11714 | 0 | 90   | 36    | 45.3829787234043 |
| DTH | DTH11715 | 0 | 14   | 46    | 44.4             |
| DTH | DTH11798 | 0 | 14   | 54    | 54               |

|     |          |   |      |      |                  |
|-----|----------|---|------|------|------------------|
| DTH | DTH11817 | 0 | 346  | 33   | 33.7368421052632 |
| DTH | DTH11830 | 0 | 140  | 25   | 30.4347826086957 |
| DTH | DTH11834 | 0 | 71   | 26   | 26.0909090909091 |
| DTH | DTH11854 | 0 | 104  | 115  | 113.7            |
| DTH | DTH11856 | 0 | 60   | 19   | 30.8571428571429 |
| DTH | DTH11862 | 0 | 53   | 44   | 49.1176470588235 |
| DTH | DTH11932 | 0 | 44   | 42   | 43.1111111111111 |
| DTH | DTH11948 | 0 | 17   | 33   | 30.6666666666667 |
| DTH | DTH11949 | 0 | 14   | 40   | 37               |
| DTH | DTH12058 | 0 | 11   | NA   | NaN              |
| DTH | DTH12059 | 0 | 13   | 20   | 20               |
| DTH | DTH12181 | 0 | 158  | 29   | 29               |
| DTH | DTH12188 | 0 | 16   | 56   | 54.3333333333333 |
| DTH | DTH12191 | 0 | 43   | NA   | NaN              |
| DTH | DTH12217 | 0 | 58   | 34   | 109.2            |
| DTH | DTH12228 | 0 | 26   | 62   | 62               |
| DTH | DTH12232 | 0 | 109  | 67.5 | 70.3448275862069 |
| DTH | DTH12250 | 0 | 215  | 63   | 51.8571428571429 |
| DTH | DTH12251 | 0 | 132  | 60   | 66.7368421052632 |
| DTH | DTH12258 | 0 | 2623 | 58   | 69.0553449583017 |
| DTH | DTH12289 | 0 | 13   | 22   | 30.6666666666667 |
| DTH | DTH12290 | 0 | 46   | 106  | 76.7179487179487 |
| DTH | DTH12298 | 0 | 203  | 34   | 37.8190476190476 |
| DTH | DTH12305 | 0 | 50   | 24   | 59.7142857142857 |
| DTH | DTH12326 | 0 | 267  | 24   | 45.75            |
| DTH | DTH12381 | 0 | 108  | 26   | 27.4117647058824 |
| DTH | DTH12383 | 0 | 10   | 22   | 45.3333333333333 |
| DTH | DTH12388 | 0 | 110  | 29   | 34.3             |
| DTH | DTH12389 | 0 | 103  | 29   | 38.304347826087  |
| DTH | DTH12390 | 0 | 296  | 27.5 | 28.2             |
| DTH | DTH12393 | 0 | 153  | 40   | 110.3            |
| DTH | DTH12412 | 0 | 492  | 34   | 39.0961538461538 |
| DTH | DTH12419 | 0 | 24   | 73   | 58.6666666666667 |
| DTH | DTH12507 | 0 | 113  | 41   | 46.0491803278689 |
| DTH | DTH12534 | 0 | 259  | 43   | 47.9195402298851 |
| DTH | DTH12537 | 0 | 22   | 35   | 41.125           |
| DTH | DTH12555 | 0 | 18   | 25   | 28.25            |
| DTH | DTH12617 | 0 | 34   | 23   | 25.875           |
| DTH | DTH12628 | 0 | 24   | 37   | 56.5384615384615 |
| DTH | DTH12645 | 0 | 17   | 77   | 76               |
| DTH | DTH12694 | 0 | 14   | 43   | 42.6             |
| DTH | DTH12697 | 0 | 21   | 38   | 44.1111111111111 |
| DTH | DTH12711 | 0 | 19   | 38   | 33.3333333333333 |
| DTH | DTH12718 | 0 | 186  | 30.5 | 151.375          |
| DTH | DTH12769 | 0 | 211  | 63.5 | 64.551724137931  |
| DTH | DTH12801 | 0 | 232  | 154  | 144.188340807175 |
| DTH | DTH12838 | 0 | 350  | 81.5 | 77.9065040650407 |
| DTH | DTH12839 | 0 | 90   | 72.5 | 75.3103448275862 |
| DTH | DTH12973 | 0 | 325  | 28   | 40.7692307692308 |
| DTH | DTH12996 | 0 | 1844 | 32   | 37.4453870625663 |
| DTH | DTH12997 | 0 | 280  | 31   | 37.7747747747748 |
| DTH | DTH13012 | 0 | 22   | 63.5 | 63.5             |
| DTH | DTH13063 | 0 | 32   | 41   | 48.1111111111111 |
| DTH | DTH13110 | 0 | 577  | 55   | 60.1994884910486 |
| DTH | DTH13117 | 0 | 450  | 121  | 126.732426303855 |
| DTH | DTH13200 | 0 | 147  | 30   | 36.2727272727273 |
| DTH | DTH13235 | 0 | 84   | 190  | 186.024096385542 |

|     |          |   |      |      |                   |
|-----|----------|---|------|------|-------------------|
| DTH | DTH13261 | 0 | 28   | 27   | 33.2              |
| DTH | DTH13439 | 0 | 13   | 24   | 25.66666666666667 |
| DTH | DTH13583 | 0 | 1462 | 41   | 48.6263383297645  |
| DTH | DTH13597 | 0 | 21   | 57   | 57                |
| DTH | DTH13636 | 0 | 22   | 72   | 71.88888888888889 |
| DTH | DTH13647 | 0 | 39   | 37   | 40.125            |
| DTH | DTH13657 | 0 | 74   | 38.5 | 46.1785714285714  |
| DTH | DTH13748 | 0 | 10   | 65   | 55                |
| DTH | DTH13854 | 0 | 120  | 47   | 59.5116279069767  |
| DTH | DTH13942 | 0 | 166  | 62   | 68.2527472527473  |
| DTH | DTH13989 | 0 | 33   | 45   | 47.1176470588235  |
| DTH | DTH13990 | 0 | 30   | 46   | 47.22222222222222 |
| DTH | DTH14072 | 0 | 14   | 21   | 21                |
| DTH | DTH14130 | 0 | 11   | 28   | 28                |
| DTH | DTH14236 | 0 | 234  | 25   | 25.8771929824561  |
| DTH | DTH14279 | 0 | 32   | 58   | 56.3636363636364  |
| DTH | DTH14804 | 0 | 1175 | 118  | 118.327630453379  |
| DTH | DTH14898 | 0 | 121  | 80.5 | 84.7307692307692  |
| DTH | DTH15065 | 0 | 78   | 28   | 37.8571428571429  |
| DTH | DTH15116 | 0 | 12   | 45   | 55.3333333333333  |
| DTH | DTH15132 | 0 | 235  | 42   | 47.1702127659574  |
| DTH | DTH15139 | 0 | 12   | 24   | 26.3333333333333  |
| DTH | DTH15158 | 0 | 79   | 56   | 55.5348837209302  |
| DTH | DTH15299 | 0 | 255  | 67   | 79.0152671755725  |
| DTH | DTH15300 | 0 | 100  | 64   | 75.1636363636364  |
| DTH | DTH15301 | 0 | 45   | 61.5 | 83.7              |
| DTH | DTH16098 | 0 | 90   | 57   | 79.2631578947368  |
| DTH | DTH16099 | 0 | 56   | 61   | 87.6              |
| DTH | DTH16100 | 0 | 40   | 105  | 92.7777777777778  |
| DTH | DTH16163 | 0 | 12   | NA   | NaN               |
| DTH | DTH16174 | 0 | 211  | 50   | 53.9              |
| DTH | DTH16203 | 0 | 29   | 27.5 | 27.5              |
| DTH | DTH16233 | 0 | 867  | 30   | 38.0476190476191  |
| DTH | DTH16329 | 0 | 598  | 70   | 87.0020325203252  |
| DTH | DTH16351 | 0 | 11   | 106  | 97                |
| DTH | DTH16373 | 0 | 611  | 74   | 94.4440559440559  |
| DTH | DTH16443 | 0 | 98   | 28   | 39.1282051282051  |
| DTH | DTH16563 | 0 | 263  | 121  | 132.171875        |
| DTH | DTH16728 | 0 | 1322 | 30   | 51.3277693474962  |
| DTH | DTH16758 | 0 | 768  | 31   | 37.1825396825397  |
| DTH | DTH16778 | 0 | 561  | 91   | 98.0576923076923  |
| DTH | DTH16779 | 0 | 108  | 90   | 90.890625         |
| DTH | DTH16783 | 0 | 149  | 39   | 44.5581395348837  |
| DTH | DTH16799 | 0 | 317  | 172  | 154.546391752577  |
| DTH | DTH16801 | 0 | 14   | 22   | 22                |
| DTM | DTM00118 | 0 | 19   | 22   | 22.3              |
| DTM | DTM00257 | 0 | 376  | 50   | 48.3404255319149  |
| DTM | DTM00266 | 0 | 47   | 64   | 470.3333333333333 |
| DTM | DTM00299 | 0 | 22   | 26   | 26                |
| DTM | DTM00460 | 0 | 41   | 34   | 34                |
| DTM | DTM00473 | 0 | 30   | 51   | 54.8235294117647  |
| DTM | DTM00555 | 0 | 37   | 24   | 24                |
| DTM | DTM00796 | 0 | 16   | 50.5 | 46.4              |
| DTM | DTM00800 | 0 | 17   | 41   | 41                |
| DTM | DTM01654 | 0 | 13   | 61   | 50.2307692307692  |
| DTM | DTM02275 | 0 | 10   | NA   | NaN               |
| DTM | DTM13640 | 0 | 178  | 59   | 54.7647058823529  |

|     |          |   |      |      |                  |
|-----|----------|---|------|------|------------------|
| DTT | DTT00008 | 0 | 32   | 23   | 30.25            |
| DTT | DTT00009 | 0 | 452  | 27   | 35.5526315789474 |
| DTT | DTT00010 | 0 | 932  | 26   | 29.015037593985  |
| DTT | DTT00011 | 0 | 519  | 30   | 37.6666666666667 |
| DTT | DTT00012 | 0 | 395  | 34   | 190              |
| DTT | DTT00013 | 0 | 137  | 28.5 | 37.375           |
| DTT | DTT00015 | 0 | 234  | 26   | 37.4242424242424 |
| DTT | DTT00016 | 0 | 632  | 32.5 | 51.5634920634921 |
| DTT | DTT00019 | 0 | 12   | 21   | 21               |
| DTT | DTT00022 | 0 | 232  | 26   | 35.5689655172414 |
| DTT | DTT00024 | 0 | 211  | 35   | 45.5689655172414 |
| DTT | DTT00026 | 0 | 1409 | 32   | 39.6736111111111 |
| DTT | DTT00027 | 0 | 316  | 32   | 38.4411764705882 |
| DTT | DTT00031 | 0 | 28   | 22.5 | 24.8333333333333 |
| DTT | DTT00032 | 0 | 291  | 40   | 44.9076923076923 |
| DTT | DTT00033 | 0 | 53   | 38   | 34.4             |
| DTT | DTT00034 | 0 | 80   | 29.5 | 34.7             |
| DTT | DTT00038 | 0 | 15   | 29   | 29               |
| DTT | DTT00040 | 0 | 13   | 28   | 28               |
| DTT | DTT00041 | 0 | 57   | 37   | 32.6666666666667 |
| DTT | DTT00042 | 0 | 429  | 30   | 42.1818181818182 |
| DTT | DTT00044 | 0 | 127  | 28   | 30.4375          |
| DTT | DTT00046 | 0 | 95   | 38.5 | 46               |
| DTT | DTT00049 | 0 | 23   | 64.5 | 61.25            |
| DTT | DTT00053 | 0 | 140  | 29   | 34.5714285714286 |
| DTT | DTT00054 | 0 | 28   | 22   | 22               |
| DTT | DTT00056 | 0 | 301  | 25   | 28.3863636363636 |
| DTT | DTT10003 | 0 | 47   | 39   | 42.9285714285714 |
| DTT | DTT10009 | 0 | 702  | 34.5 | 63.9333333333333 |
| DTT | DTT10033 | 0 | 52   | 38   | 38.5             |
| DTT | DTT10037 | 0 | 93   | 20   | 20               |
| DTT | DTT10038 | 0 | 74   | 26   | 26               |
| DTT | DTT10054 | 0 | 55   | 23   | 28.3333333333333 |
| DTT | DTT10062 | 0 | 273  | 39.5 | 37.5             |
| DTT | DTT10089 | 0 | 148  | 25   | 32               |
| DTT | DTT10101 | 0 | 128  | 23.5 | 38.25            |
| DTT | DTT10115 | 0 | 160  | 28.5 | 31.28125         |
| DTT | DTT10116 | 0 | 112  | 30   | 31.9459459459459 |
| DTT | DTT10125 | 0 | 32   | 25   | 25.4285714285714 |
| DTT | DTT10171 | 0 | 72   | 30   | 33.3333333333333 |
| DTT | DTT10172 | 0 | 73   | 24   | 28.5714285714286 |
| DTT | DTT10193 | 0 | 59   | 20   | 20               |
| DTT | DTT10253 | 0 | 29   | 49.5 | 46.6666666666667 |
| DTT | DTT10254 | 0 | 384  | 47   | 52.6157894736842 |
| DTT | DTT10260 | 0 | 125  | NA   | NaN              |
| DTT | DTT10319 | 0 | 26   | 29   | 28.6666666666667 |
| DTT | DTT10370 | 0 | 21   | 24   | 24               |
| DTT | DTT10404 | 0 | 13   | 25   | 29.7142857142857 |
| DTT | DTT10422 | 0 | 11   | 24   | 32.3333333333333 |
| DTT | DTT10423 | 0 | 18   | 38   | 38               |
| DTT | DTT10433 | 0 | 21   | 34.5 | 35               |
| DTT | DTT10449 | 0 | 11   | 39.5 | 39.5             |
| DTT | DTT10459 | 0 | 43   | 36   | 37.375           |
| DTT | DTT10475 | 0 | 148  | 24   | 27.9016393442623 |
| DTT | DTT10539 | 0 | 22   | 51   | 48.2857142857143 |
| DTT | DTT10540 | 0 | 13   | 44   | 37.4285714285714 |
| DTT | DTT10577 | 0 | 806  | 34   | 35.7627118644068 |

|     |          |   |      |       |                  |
|-----|----------|---|------|-------|------------------|
| DTT | DTT10584 | 0 | 16   | NA    | NaN              |
| DTT | DTT10594 | 0 | 15   | 55    | 55               |
| DTT | DTT10647 | 0 | 12   | NA    | NaN              |
| DTT | DTT10693 | 0 | 79   | 31    | 35.6666666666667 |
| DTT | DTT10706 | 0 | 204  | 22    | 22               |
| DTT | DTT10724 | 0 | 58   | 99    | 77.2727272727273 |
| DTT | DTT10738 | 0 | 51   | 24    | 29               |
| DTT | DTT10742 | 0 | 15   | 20    | 20               |
| DTT | DTT10797 | 0 | 889  | 29    | 27.8618421052632 |
| DTT | DTT10806 | 0 | 18   | 25    | 25               |
| DTT | DTT10833 | 0 | 9953 | 37    | 44.4548395123165 |
| DTT | DTT10841 | 0 | 28   | NA    | NaN              |
| DTT | DTT10864 | 0 | 113  | 41    | 41.6481481481481 |
| DTT | DTT10865 | 0 | 56   | 30    | 31               |
| DTT | DTT10873 | 0 | 122  | 26    | 33.3478260869565 |
| DTT | DTT10880 | 0 | 6151 | 33    | 37.9612289685443 |
| DTT | DTT10889 | 0 | 267  | 28    | 36.7959183673469 |
| DTT | DTT10892 | 0 | 69   | 41    | 46.3636363636364 |
| DTT | DTT10893 | 0 | 39   | 28.5  | 32.5             |
| DTT | DTT10906 | 0 | 19   | 24    | 24               |
| DTT | DTT10907 | 0 | 15   | 22    | 22               |
| DTT | DTT10927 | 0 | 277  | 25    | 31.3125          |
| DTT | DTT10937 | 0 | 25   | 38.5  | 38.5             |
| DTT | DTT10986 | 0 | 20   | 37.5  | 43               |
| DTT | DTT11051 | 0 | 51   | 34.5  | 39.0769230769231 |
| DTT | DTT11056 | 0 | 231  | 34    | 34.7121212121212 |
| DTT | DTT11071 | 0 | 16   | 30.5  | 30.5             |
| DTT | DTT11073 | 0 | 199  | 33    | 36               |
| DTT | DTT11075 | 0 | 41   | 29    | 38.4375          |
| DTT | DTT11090 | 0 | 169  | 49    | 48.7777777777778 |
| DTT | DTT11146 | 0 | 48   | 32    | 37.2             |
| DTT | DTT11147 | 0 | 12   | 45    | 41.6666666666667 |
| DTT | DTT11169 | 0 | 39   | 24    | 24               |
| DTT | DTT11170 | 0 | 51   | 47.5  | 47.5             |
| DTT | DTT11191 | 0 | 16   | 116   | 97.3333333333333 |
| DTT | DTT11230 | 0 | 53   | 35    | 37.5555555555556 |
| DTT | DTT11244 | 0 | 56   | 47    | 41.1333333333333 |
| DTT | DTT11258 | 0 | 15   | 33    | 30               |
| DTT | DTT11275 | 0 | 16   | 24    | 23.3333333333333 |
| DTT | DTT11278 | 0 | 50   | 30    | 41.3333333333333 |
| DTT | DTT11287 | 0 | 11   | 34    | 34.7777777777778 |
| DTT | DTT11292 | 0 | 73   | 22.5  | 25.6875          |
| DTT | DTT11306 | 0 | 21   | 33    | 33.2             |
| DTT | DTT11307 | 0 | 11   | 25    | 25               |
| DTT | DTT11338 | 0 | 296  | 59.5  | 61.9918032786885 |
| DTT | DTT11408 | 0 | 48   | 50    | 51               |
| DTT | DTT11421 | 0 | 14   | 100.5 | 92.5             |
| DTT | DTT11451 | 0 | 88   | 47.5  | 51.8             |
| DTT | DTT11452 | 0 | 10   | 48    | 48               |
| DTT | DTT11463 | 0 | 45   | 34    | 35.2             |
| DTT | DTT11547 | 0 | 1825 | 38    | 49.8983050847458 |
| DTT | DTT11587 | 0 | 98   | 28.5  | 31.875           |
| DTT | DTT11612 | 0 | 53   | 35    | 41.8666666666667 |
| DTT | DTT11681 | 0 | 44   | 44    | 39.6             |
| DTT | DTT11719 | 0 | 69   | 46    | 52.8181818181818 |
| DTT | DTT11766 | 0 | 11   | 39    | 39               |
| DTT | DTT11806 | 0 | 37   | 37    | 48.4285714285714 |

|     |          |   |      |      |                  |
|-----|----------|---|------|------|------------------|
| DTT | DTT11836 | 0 | 16   | 58.5 | 58.5             |
| DTT | DTT12019 | 0 | 100  | 42.5 | 41.75            |
| DTT | DTT12061 | 0 | 170  | 39   | 36.6             |
| DTT | DTT12092 | 0 | 33   | 29   | 28               |
| DTT | DTT12107 | 0 | 55   | 53   | 60.8260869565217 |
| DTT | DTT12131 | 0 | 69   | 31.5 | 38.5             |
| DTT | DTT12147 | 0 | 50   | 35   | 42.9230769230769 |
| DTT | DTT12149 | 0 | 33   | 28   | 28.375           |
| DTT | DTT12151 | 0 | 43   | 23   | 26.08            |
| DTT | DTT12171 | 0 | 307  | 133  | 122.582644628099 |
| DTT | DTT12202 | 0 | 1062 | 35   | 42.6472081218274 |
| DTT | DTT12206 | 0 | 22   | 38   | 38               |
| DTT | DTT12283 | 0 | 470  | 38.5 | 43.3490566037736 |
| DTT | DTT12293 | 0 | 146  | 43   | 47.9354838709677 |
| DTT | DTT12378 | 0 | 21   | 40   | 40.3             |
| DTT | DTT12418 | 0 | 1304 | 138  | 132.157399486741 |
| DTT | DTT12506 | 0 | 1108 | 37   | 43.2792792792793 |
| DTT | DTT12510 | 0 | 51   | 22.5 | 22.5             |
| DTT | DTT12572 | 0 | 550  | 33   | 36.5084745762712 |
| DTT | DTT12632 | 0 | 144  | 53   | 58.6521739130435 |
| DTT | DTT12746 | 0 | 56   | 31   | 39.4285714285714 |
| DTT | DTT12754 | 0 | 51   | 23   | 22               |
| DTT | DTT12757 | 0 | 294  | 26   | 33.1             |
| DTT | DTT12762 | 0 | 108  | 50   | 49.6315789473684 |
| DTT | DTT12764 | 0 | 39   | 27.5 | 27.5             |
| DTT | DTT12820 | 0 | 11   | 123  | 121              |
| DTT | DTT12824 | 0 | 48   | 38   | 38.4             |
| DTT | DTT12825 | 0 | 19   | 33   | 35               |
| DTT | DTT12875 | 0 | 634  | 31   | 32.9934640522876 |
| DTT | DTT12876 | 0 | 247  | 29   | 34.0444444444444 |
| DTT | DTT12955 | 0 | 383  | 27   | 43.7407407407407 |
| DTT | DTT12967 | 0 | 172  | 28   | 36.7058823529412 |
| DTT | DTT12974 | 0 | 684  | 35   | 39.0595238095238 |
| DTT | DTT13041 | 0 | 4111 | 57   | 55.946103423161  |
| DTT | DTT13098 | 0 | 114  | 26   | 36.6153846153846 |
| DTT | DTT13262 | 0 | 64   | 32   | 33.125           |
| DTT | DTT13272 | 0 | 58   | 71   | 82.8571428571429 |
| DTT | DTT13542 | 0 | 21   | 31   | 30.75            |
| DTT | DTT13549 | 0 | 13   | 55   | 49.3333333333333 |
| DTT | DTT13551 | 0 | 18   | 20   | 20               |
| DTT | DTT13762 | 0 | 41   | 24   | 25.5555555555556 |
| DTT | DTT13827 | 0 | 16   | 47   | 47               |
| DTT | DTT13868 | 0 | 12   | 51   | 49.7             |
| DTT | DTT13979 | 0 | 117  | 29   | 35.1333333333333 |
| DTT | DTT14079 | 0 | 17   | NA   | NaN              |
| DTT | DTT14220 | 0 | 57   | 25   | 31.3333333333333 |
| DTT | DTT14352 | 0 | 20   | 24   | 29.2             |
| DTT | DTT14358 | 0 | 231  | 41   | 47.7560975609756 |
| DTT | DTT14774 | 0 | 17   | 30   | 30               |
| DTT | DTT14784 | 0 | 1391 | 27   | 32.1055555555556 |
| DTT | DTT15038 | 0 | 23   | 24   | 24               |
| DTT | DTT15227 | 0 | 14   | NA   | NaN              |
| DTT | DTT15264 | 0 | 248  | 19.5 | 26.2051282051282 |
| DTT | DTT15335 | 0 | 28   | 26.5 | 24.625           |
| DTT | DTT15443 | 0 | 143  | 35   | 38.6739130434783 |
| DTT | DTT15444 | 0 | 519  | 33.5 | 35.0967741935484 |
| DTT | DTT15534 | 0 | 48   | 42   | 45.6             |



|     |          |   |      |       |                  |
|-----|----------|---|------|-------|------------------|
| DTT | DTT15615 | 0 | 15   | 28.5  | 31               |
| DTT | DTT15785 | 0 | 30   | 27.5  | 31.25            |
| DTT | DTT15993 | 0 | 671  | 38    | 44.8076923076923 |
| DTT | DTT16190 | 0 | 3555 | 31    | 37.0521978021978 |
| DTT | DTT16489 | 0 | 414  | 25.5  | 25.125           |
| DTX | DTX10013 | 0 | 270  | 34    | 82.462962962963  |
| DTX | DTX10015 | 0 | 46   | 44.5  | 47.7777777777778 |
| DTX | DTX10020 | 0 | 94   | 23.5  | 28.4166666666667 |
| DTX | DTX10023 | 0 | 26   | 26    | 26.6666666666667 |
| DTX | DTX10031 | 0 | 100  | 70    | 124.4375         |
| DTX | DTX10032 | 0 | 83   | 71.5  | 71.7241379310345 |
| DTX | DTX10124 | 0 | 56   | 30    | 35.6428571428571 |
| DTX | DTX10131 | 0 | 120  | 27    | 31               |
| DTX | DTX10132 | 0 | 90   | 29    | 33.75            |
| DTX | DTX10177 | 0 | 2850 | 27    | 33.3927272727273 |
| DTX | DTX10207 | 0 | 108  | 39    | 43               |
| DTX | DTX10212 | 0 | 101  | 28    | 30.9375          |
| DTX | DTX10213 | 0 | 15   | NA    | NaN              |
| DTX | DTX10267 | 0 | 51   | 36    | 37.84            |
| DTX | DTX10308 | 0 | 105  | 40    | 43.4285714285714 |
| DTX | DTX10309 | 0 | 14   | 41    | 39               |
| DTX | DTX10416 | 0 | 19   | 32    | 36.4444444444444 |
| DTX | DTX10541 | 0 | 13   | 25    | 31.8             |
| DTX | DTX10542 | 0 | 26   | 31    | 40.6             |
| DTX | DTX10813 | 0 | 20   | 32    | 33.5454545454545 |
| DTX | DTX10824 | 0 | 38   | 25    | 25               |
| DTX | DTX10825 | 0 | 41   | 26    | 26               |
| DTX | DTX10840 | 0 | 243  | 31    | 34.0263157894737 |
| DTX | DTX10945 | 0 | 10   | 24    | 39.6666666666667 |
| DTX | DTX11005 | 0 | 33   | 25    | 35               |
| DTX | DTX11011 | 0 | 75   | 26    | 34.625           |
| DTX | DTX11123 | 0 | 49   | 39    | 50.4814814814815 |
| DTX | DTX11178 | 0 | 18   | 23    | 22.3333333333333 |
| DTX | DTX11265 | 0 | 21   | 47    | 49.6363636363636 |
| DTX | DTX11433 | 0 | 776  | 30    | 39.36            |
| DTX | DTX11622 | 0 | 14   | 40    | 42.3333333333333 |
| DTX | DTX11661 | 0 | 206  | 61    | 55.7796610169492 |
| DTX | DTX11816 | 0 | 62   | 26    | 27.25            |
| DTX | DTX11871 | 0 | 273  | 43    | 46.4565217391304 |
| DTX | DTX12196 | 0 | 26   | 33    | 33               |
| DTX | DTX12197 | 0 | 141  | 90    | 76.2238805970149 |
| DTX | DTX12438 | 0 | 23   | 56    | 54.5384615384615 |
| DTX | DTX12495 | 0 | 281  | 45    | 168.875          |
| DTX | DTX12496 | 0 | 195  | 26    | 49.6031746031746 |
| DTX | DTX12540 | 0 | 22   | 40    | 40               |
| DTX | DTX12562 | 0 | 18   | 49    | 62.4             |
| DTX | DTX12870 | 0 | 1297 | 33    | 38.7846364883402 |
| DTX | DTX12956 | 0 | 428  | 32    | 36.665306122449  |
| DTX | DTX12962 | 0 | 778  | 45    | 74.0625          |
| DTX | DTX13146 | 0 | 3356 | 39    | 49.6301476301476 |
| DTX | DTX13147 | 0 | 474  | 44    | 52.0334928229665 |
| DTX | DTX13328 | 0 | 708  | 41    | 51.4421768707483 |
| RIL | RIL00001 | 0 | 49   | 490   | 594.673469387755 |
| RIL | RIL00002 | 0 | 28   | 231   | 291.357142857143 |
| RIL | RIL00003 | 0 | 21   | 326   | 418.952380952381 |
| RIL | RIL00004 | 0 | 22   | 584.5 | 608.318181818182 |
| RIL | RIL00005 | 0 | 33   | 387   | 440.878787878788 |

|     |          |   |     |       |                  |
|-----|----------|---|-----|-------|------------------|
| RIL | RIL00006 | 0 | 21  | 906   | 822.761904761905 |
| RIL | RIL00007 | 0 | 12  | 503.5 | 587.916666666667 |
| RIL | RIL00008 | 0 | 44  | 338   | 344.5            |
| RIL | RIL00009 | 0 | 27  | 658   | 628.576923076923 |
| RIL | RIL00013 | 0 | 10  | 244   | 274.5            |
| RIL | RIL00015 | 0 | 15  | 580   | 696              |
| RIL | RIL00016 | 0 | 18  | 431.5 | 522.055555555556 |
| RIL | RIL00017 | 0 | 16  | 586.5 | 618.375          |
| RIL | RIL00019 | 0 | 14  | 572   | 641.5            |
| RIL | RIL00020 | 0 | 10  | 958.5 | 771.9            |
| RIL | RIL00021 | 0 | 21  | 608   | 652.285714285714 |
| RIL | RIL00025 | 0 | 17  | 611   | 644.235294117647 |
| RIL | RIL00026 | 0 | 14  | 933   | 900              |
| RIL | RIL00028 | 0 | 11  | 636   | 750.454545454545 |
| RIT | RIT00001 | 0 | 169 | 280   | 304.109090909091 |
| RIT | RIT00002 | 0 | 129 | 159   | 246.258620689655 |
| RLC | RLC00097 | 0 | 43  | 390   | 401.139534883721 |
| RLC | RLC00116 | 0 | 34  | 339.5 | 394.625          |
| RLC | RLC00119 | 0 | 34  | 355.5 | 344.916666666667 |
| RLC | RLC00146 | 0 | 26  | 242.5 | 305.269230769231 |
| RLC | RLC00148 | 0 | 29  | 155   | 236.75           |
| RLC | RLC00154 | 0 | 26  | 61    | 104.923076923077 |
| RLC | RLC00182 | 0 | 22  | 980.5 | 966.727272727273 |
| RLC | RLC00184 | 0 | 23  | 75    | 97.7826086956522 |
| RLC | RLC00200 | 0 | 12  | 88    | 363              |
| RLC | RLC00218 | 0 | 17  | 327   | 402.764705882353 |
| RLC | RLC00228 | 0 | 16  | 365   | 378.2            |
| RLC | RLC00247 | 0 | 14  | 313.5 | 377.5            |
| RLC | RLC00248 | 0 | 15  | 326   | 369.4            |
| RLC | RLC00250 | 0 | 15  | 213   | 248.866666666667 |
| RLC | RLC00255 | 0 | 13  | 292   | 305.153846153846 |
| RLC | RLC00274 | 0 | 16  | 500   | 536.5            |
| RLC | RLC00279 | 0 | 13  | 579   | 538.769230769231 |
| RLC | RLC00293 | 0 | 11  | 513   | 478.545454545455 |
| RLC | RLC00311 | 0 | 11  | 276   | 356.727272727273 |
| RLC | RLC00340 | 0 | 12  | 660.5 | 745.5            |
| RLC | RLC00358 | 0 | 10  | 920   | 905.6            |
| RLC | RLC00375 | 0 | 10  | 471.5 | 787.9            |
| RLC | RLC00462 | 0 | 11  | 75    | 189.909090909091 |
| RLC | RLC01304 | 0 | 19  | 660   | 747.578947368421 |
| RLC | RLC02403 | 0 | 51  | 1064  | 974.901960784314 |
| RLC | RLC02882 | 0 | 33  | 683   | 554.272727272727 |
| RLC | RLC06245 | 0 | 45  | 546   | 495.644444444444 |
| RLC | RLC19829 | 0 | 129 | 728   | 678.573643410853 |
| RLG | RLG00053 | 0 | 121 | 381.5 | 392.708333333333 |
| RLG | RLG00077 | 0 | 60  | 42    | 124.529411764706 |
| RLG | RLG00084 | 0 | 51  | 59    | 87.8823529411765 |
| RLG | RLG00100 | 0 | 55  | 618   | 479.137254901961 |
| RLG | RLG00106 | 0 | 33  | 270   | 304.333333333333 |
| RLG | RLG00114 | 0 | 35  | 300   | 339.971428571429 |
| RLG | RLG00115 | 0 | 34  | 422   | 475.411764705882 |
| RLG | RLG00120 | 0 | 33  | 259   | 289.515151515152 |
| RLG | RLG00131 | 0 | 29  | 385   | 422.793103448276 |
| RLG | RLG00152 | 0 | 26  | 58.5  | 81.8076923076923 |
| RLG | RLG00174 | 0 | 21  | 91    | 173.421052631579 |
| RLG | RLG00181 | 0 | 22  | 304.5 | 353.272727272727 |
| RLG | RLG00186 | 0 | 21  | 254.5 | 308              |

|     |          |   |     |       |                  |
|-----|----------|---|-----|-------|------------------|
| RLG | RLG00191 | 0 | 19  | 225   | 279.157894736842 |
| RLG | RLG00192 | 0 | 20  | 402   | 396.1            |
| RLG | RLG00193 | 0 | 17  | 275   | 318              |
| RLG | RLG00223 | 0 | 15  | 292   | 328.8            |
| RLG | RLG00226 | 0 | 15  | 278   | 279.066666666667 |
| RLG | RLG00227 | 0 | 14  | 264.5 | 300.357142857143 |
| RLG | RLG00237 | 0 | 10  | 231   | 305.1            |
| RLG | RLG00239 | 0 | 16  | 320   | 316.4375         |
| RLG | RLG00241 | 0 | 15  | 247   | 262.733333333333 |
| RLG | RLG00242 | 0 | 15  | 272   | 337.933333333333 |
| RLG | RLG00251 | 0 | 15  | 276   | 347              |
| RLG | RLG00261 | 0 | 14  | 77    | 186.142857142857 |
| RLG | RLG00263 | 0 | 14  | 438   | 446.571428571429 |
| RLG | RLG00270 | 0 | 11  | 293.5 | 284.5            |
| RLG | RLG00275 | 0 | 11  | 67    | 72.2727272727273 |
| RLG | RLG00283 | 0 | 13  | 361   | 597.538461538462 |
| RLG | RLG00289 | 0 | 11  | 809   | 752.727272727273 |
| RLG | RLG00306 | 0 | 11  | 238   | 300.454545454545 |
| RLG | RLG00323 | 0 | 12  | 349.5 | 362              |
| RLG | RLG00326 | 0 | 11  | 638   | 638              |
| RLG | RLG00327 | 0 | 13  | 99    | 147              |
| RLG | RLG00330 | 0 | 10  | 209.5 | 270.1            |
| RLG | RLG00331 | 0 | 11  | 292   | 345.090909090909 |
| RLG | RLG00334 | 0 | 11  | 564   | 557.636363636364 |
| RLG | RLG00342 | 0 | 11  | 302   | 329.363636363636 |
| RLG | RLG00357 | 0 | 10  | 167.5 | 184.2            |
| RLG | RLG00376 | 0 | 12  | 345   | 368.583333333333 |
| RLG | RLG00382 | 0 | 15  | 163   | 369.866666666667 |
| RLG | RLG00404 | 0 | 51  | 518   | 560.764705882353 |
| RLG | RLG00417 | 0 | 10  | 341   | 353.2            |
| RLG | RLG00620 | 0 | 198 | 551   | 590.89898989899  |
| RLG | RLG01210 | 0 | 250 | 437   | 497.224          |
| RLG | RLG01224 | 0 | 18  | 356.5 | 421.944444444444 |
| RLG | RLG01297 | 0 | 14  | 75    | 169.307692307692 |
| RLG | RLG01328 | 0 | 36  | 399   | 475.833333333333 |
| RLG | RLG01860 | 0 | 18  | 227   | 240.833333333333 |
| RLG | RLG02129 | 0 | 60  | 634   | 683.466666666667 |
| RLG | RLG02424 | 0 | 21  | 242   | 259.047619047619 |
| RLG | RLG02722 | 0 | 131 | 381   | 397.885496183206 |
| RLG | RLG04884 | 0 | 82  | 577.5 | 526.963414634146 |
| RLG | RLG07846 | 0 | 156 | 628   | 575.532051282051 |
| RLG | RLG07969 | 0 | 18  | 326   | 348.888888888889 |
| RLG | RLG16490 | 0 | 27  | 478   | 483.814814814815 |
| RLG | RLG20706 | 0 | 34  | 72    | 79.0333333333333 |
| RLG | RLG21631 | 0 | 68  | 291   | 275.602941176471 |
| RLG | RLG22910 | 0 | 65  | 317   | 311.138461538462 |
| RLG | RLG23054 | 0 | 44  | 969.5 | 958.363636363636 |
| RLG | RLG23897 | 0 | 11  | 192   | 197.636363636364 |
| RLX | RLX00065 | 0 | 83  | 264.5 | 250.175          |
| RLX | RLX00066 | 0 | 85  | 76    | 82.4939759036145 |
| RLX | RLX00092 | 0 | 63  | 95    | 114.983870967742 |
| RLX | RLX00094 | 0 | 47  | 306   | 252.652173913043 |
| RLX | RLX00095 | 0 | 44  | 613   | 517.790697674419 |
| RLX | RLX00134 | 0 | 29  | 352   | 493.047619047619 |
| RLX | RLX00144 | 0 | 27  | 238   | 318.740740740741 |
| RLX | RLX00168 | 0 | 24  | 303   | 254.04347826087  |
| RLX | RLX00171 | 0 | 27  | 623   | 534              |

|     |          |   |     |       |                  |
|-----|----------|---|-----|-------|------------------|
| RLX | RLX00172 | 0 | 23  | 243   | 232.47619047619  |
| RLX | RLX00196 | 0 | 19  | 56    | 97.2105263157895 |
| RLX | RLX00197 | 0 | 18  | 54.5  | 102              |
| RLX | RLX00210 | 0 | 18  | 138.5 | 154.666666666667 |
| RLX | RLX00219 | 0 | 19  | 93    | 111.368421052632 |
| RLX | RLX00220 | 0 | 17  | 220   | 229.294117647059 |
| RLX | RLX00230 | 0 | 16  | 86    | 104              |
| RLX | RLX00234 | 0 | 16  | 72.5  | 101.3125         |
| RLX | RLX00245 | 0 | 16  | 87    | 113.0625         |
| RLX | RLX00264 | 0 | 14  | 103   | 178.153846153846 |
| RLX | RLX00299 | 0 | 12  | 63    | 86.5             |
| RLX | RLX00301 | 0 | 12  | 27    | 27               |
| RLX | RLX00315 | 0 | 13  | 177   | 175.076923076923 |
| RLX | RLX00317 | 0 | 12  | 198.5 | 250.666666666667 |
| RLX | RLX00349 | 0 | 10  | 59    | 69.3333333333333 |
| RLX | RLX00360 | 0 | 10  | 229.5 | 298.6            |
| RLX | RLX00369 | 0 | 10  | 178   | 154.5            |
| RLX | RLX00370 | 0 | 10  | 295   | 275.5            |
| RLX | RLX00560 | 0 | 14  | 249   | 247.428571428571 |
| RLX | RLX00647 | 0 | 12  | 765.5 | 814.916666666667 |
| RLX | RLX00824 | 0 | 50  | 126   | 165.615384615385 |
| RLX | RLX00910 | 0 | 13  | 536   | 591.692307692308 |
| RLX | RLX01857 | 0 | 36  | 641   | 677.944444444444 |
| RLX | RLX01925 | 0 | 14  | 569   | 563.615384615385 |
| RLX | RLX02412 | 0 | 23  | 897   | 832.521739130435 |
| RLX | RLX02653 | 0 | 15  | 320   | 341.733333333333 |
| RLX | RLX02676 | 0 | 75  | 690   | 653.813333333333 |
| RLX | RLX03238 | 0 | 13  | 252   | 206.769230769231 |
| RLX | RLX03863 | 0 | 183 | 943   | 886.07650273224  |
| RLX | RLX04027 | 0 | 32  | 333   | 300.15625        |
| RLX | RLX06052 | 0 | 25  | 760   | 760.84           |
| RLX | RLX06850 | 0 | 10  | 505   | 532              |
| RLX | RLX06925 | 0 | 10  | 416.5 | 358.8            |
| RLX | RLX07110 | 0 | 22  | 456.5 | 459              |
| RLX | RLX07511 | 0 | 41  | 60    | 78.4878048780488 |
| RLX | RLX08341 | 0 | 13  | 265   | 307.769230769231 |
| RLX | RLX08581 | 0 | 28  | 156   | 160.607142857143 |
| RLX | RLX09595 | 0 | 22  | 468.5 | 447.363636363636 |
| RLX | RLX10780 | 0 | 13  | 188   | 180.307692307692 |
| RLX | RLX10916 | 0 | 64  | 756   | 715.859375       |
| RLX | RLX11328 | 0 | 24  | 524   | 484.333333333333 |
| RLX | RLX11700 | 0 | 11  | 212   | 231.727272727273 |
| RLX | RLX12104 | 0 | 32  | 298.5 | 355.03125        |
| RLX | RLX12410 | 0 | 10  | 246   | 284.9            |
| RLX | RLX12632 | 0 | 10  | 34    | 49.3             |
| RLX | RLX12917 | 0 | 43  | 622   | 542.46511627907  |
| RLX | RLX13049 | 0 | 334 | 688   | 673.446107784431 |
| RLX | RLX13352 | 0 | 13  | 364   | 399.461538461538 |
| RLX | RLX13514 | 0 | 153 | 819   | 840.843137254902 |
| RLX | RLX13529 | 0 | 185 | 252   | 230.918918918919 |
| RLX | RLX13698 | 0 | 105 | 627   | 565.857142857143 |
| RLX | RLX13810 | 0 | 12  | 490.5 | 483.333333333333 |
| RLX | RLX14021 | 0 | 31  | 458   | 624.032258064516 |
| RLX | RLX14124 | 0 | 28  | 406.5 | 438.357142857143 |
| RLX | RLX14762 | 0 | 11  | 442   | 423.909090909091 |
| RLX | RLX16782 | 0 | 168 | 652   | 591.690476190476 |
| RLX | RLX17675 | 0 | 105 | 627   | 665.959595959596 |

|     |          |   |    |       |                  |
|-----|----------|---|----|-------|------------------|
| RLX | RLX19305 | 0 | 13 | 150   | 155.846153846154 |
| RLX | RLX19534 | 0 | 21 | 67.5  | 67.2777777777778 |
| RLX | RLX19697 | 0 | 13 | 372   | 406.615384615385 |
| RLX | RLX19762 | 0 | 28 | 278.5 | 319.107142857143 |
| RLX | RLX22845 | 0 | 15 | 358   | 355.933333333333 |
| RLX | RLX23205 | 0 | 16 | 294.5 | 314.625          |
| RLX | RLX23786 | 0 | 41 | 44    | 51.2564102564103 |
| RST | RST00001 | 0 | 22 | 29    | 29.25            |
| RST | RST00003 | 0 | 17 | 169   | 149.352941176471 |
| RST | RST00004 | 0 | 18 | 126   | 110.0625         |
| RST | RST00005 | 0 | 38 | 50    | 48.8888888888889 |
| RST | RST00008 | 0 | 16 | 97    | 100.375          |
| RST | RST00010 | 0 | 25 | NA    | NaN              |
| RST | RST00014 | 0 | 41 | 54    | 55.6666666666667 |
| RST | RST00016 | 0 | 32 | 27    | 31.6666666666667 |
| RST | RST00019 | 0 | 15 | 43    | 43               |

**Table S4.** Mean methylation levels across superfamilies, averaged across all tissues, and averaged within a tissue (all3=seedling)

| sup | avg_cg | avg_chg | avg_chh | SAM_avg_cg | SAM_avg_chg | SAM_avg_chh | all3_avg_cg | all3_avg_chg | all3_avg_chh | flagleaf_avg_cg | flagleaf_avg_chg | flagleaf_avg_chh | earshoot_avg_cg | earshoot_avg_chg | earshoot_avg_chh | anther_avg_cg | anther_avg_chg | anther_avg_chh |
|-----|--------|---------|---------|------------|-------------|-------------|-------------|--------------|--------------|-----------------|------------------|------------------|-----------------|------------------|------------------|---------------|----------------|----------------|
| DHH | 0.768  | 0.659   | 0.034   | 0.741      | 0.606       | 0.025       | 0.743       | 0.743        | 0.050        | 0.806           | 0.686            | 0.036            | 0.778           | 0.655            | 0.028            | 0.773         | 0.604          | 0.028          |
| DTA | 0.804  | 0.607   | 0.082   | 0.774      | 0.519       | 0.060       | 0.782       | 0.782        | 0.101        | 0.840           | 0.637            | 0.114            | 0.816           | 0.575            | 0.067            | 0.807         | 0.524          | 0.068          |
| DTC | 0.833  | 0.693   | 0.046   | 0.799      | 0.625       | 0.034       | 0.811       | 0.811        | 0.061        | 0.875           | 0.726            | 0.052            | 0.843           | 0.688            | 0.041            | 0.837         | 0.617          | 0.040          |
| DTH | 0.811  | 0.681   | 0.062   | 0.781      | 0.616       | 0.046       | 0.794       | 0.794        | 0.085        | 0.847           | 0.712            | 0.079            | 0.822           | 0.670            | 0.047            | 0.812         | 0.611          | 0.052          |
| DTM | 0.738  | 0.595   | 0.144   | 0.713      | 0.525       | 0.095       | 0.708       | 0.708        | 0.199        | 0.623           | 0.195            | 0.758            | 0.592           | 0.104            | 0.741            | 0.529         | 0.128          |                |
| DTT | 0.801  | 0.674   | 0.044   | 0.773      | 0.617       | 0.032       | 0.775       | 0.775        | 0.068        | 0.839           | 0.702            | 0.050            | 0.813           | 0.671            | 0.034            | 0.803         | 0.602          | 0.034          |
| DTX | 0.848  | 0.732   | 0.041   | 0.816      | 0.670       | 0.033       | 0.838       | 0.838        | 0.060        | 0.883           | 0.766            | 0.042            | 0.854           | 0.725            | 0.034            | 0.851         | 0.663          | 0.034          |
| RIL | 0.837  | 0.687   | 0.025   | 0.809      | 0.617       | 0.019       | 0.801       | 0.801        | 0.037        | 0.879           | 0.700            | 0.026            | 0.850           | 0.677            | 0.021            | 0.844         | 0.639          | 0.019          |
| RIT | 0.850  | 0.725   | 0.032   | 0.822      | 0.653       | 0.023       | 0.824       | 0.824        | 0.043        | 0.891           | 0.767            | 0.043            | 0.861           | 0.714            | 0.027            | 0.854         | 0.669          | 0.024          |
| RLC | 0.824  | 0.677   | 0.027   | 0.794      | 0.617       | 0.021       | 0.797       | 0.797        | 0.047        | 0.868           | 0.705            | 0.027            | 0.834           | 0.668            | 0.022            | 0.827         | 0.597          | 0.020          |
| RLG | 0.842  | 0.735   | 0.029   | 0.812      | 0.681       | 0.024       | 0.822       | 0.822        | 0.043        | 0.879           | 0.762            | 0.028            | 0.850           | 0.736            | 0.025            | 0.845         | 0.673          | 0.024          |
| RLX | 0.806  | 0.695   | 0.028   | 0.776      | 0.642       | 0.022       | 0.784       | 0.784        | 0.044        | 0.844           | 0.721            | 0.028            | 0.815           | 0.696            | 0.024            | 0.808         | 0.633          | 0.023          |
| RST | 0.740  | 0.570   | 0.035   | 0.716      | 0.510       | 0.027       | 0.716       | 0.716        | 0.053        | 0.773           | 0.574            | 0.040            | 0.755           | 0.553            | 0.027            | 0.742         | 0.497          | 0.027          |

**Table S5.** TE families that lack methylatable cytosines (presented as family median values).

| sup | fam      | famsize | tebp    | percGC | nCG   | nCHG  | nCHH  |
|-----|----------|---------|---------|--------|-------|-------|-------|
| DTH | DTH00067 | 602     | 196     | 0.318  | 0     | 0.009 | 0.139 |
| DTH | DTH00073 | 122     | 127     | 0.441  | 0     | 0     | 0.201 |
| DTH | DTH00090 | 214     | 127     | 0.302  | 0     | 0.016 | 0.120 |
| DTH | DTH00119 | 124     | 138     | 0.388  | 0     | 0     | 0.173 |
| DTH | DTH00163 | 968     | 116     | 0.350  | 0     | 0     | 0.151 |
| DTH | DTH00280 | 289     | 200     | 0.440  | 0     | 0.105 | 0.105 |
| DTH | DTH00320 | 95      | 248     | 0.330  | 0     | 0.002 | 0.154 |
| DTH | DTH00409 | 748     | 178     | 0.296  | 0     | 0     | 0.132 |
| DTH | DTH00410 | 76      | 147     | 0.262  | 0     | 0.015 | 0.105 |
| DTH | DTH00460 | 81      | 116     | 0.364  | 0     | 0     | 0.155 |
| DTH | DTH00486 | 16      | 138     | 0.415  | 0     | 0     | 0.187 |
| DTH | DTH10176 | 146     | 160     | 0.371  | 0     | 0     | 0.175 |
| DTH | DTH10226 | 15      | 130     | 0.354  | 0.008 | 0     | 0.165 |
| DTH | DTH10700 | 368     | 103     | 0.386  | 0     | 0     | 0.190 |
| DTH | DTH10730 | 3, 113  | 67      | 0.412  | 0     | 0     | 0.201 |
| DTH | DTH10855 | 659     | 88      | 0.307  | 0     | 0.011 | 0.142 |
| DTH | DTH10856 | 126     | 88      | 0.308  | 0     | 0.011 | 0.142 |
| DTH | DTH10946 | 179     | 87      | 0.483  | 0     | 0.141 | 0.103 |
| DTH | DTH11101 | 409     | 67      | 0.409  | 0     | 0     | 0.205 |
| DTH | DTH11481 | 35      | 52      | 0.347  | 0     | 0.008 | 0.159 |
| DTH | DTH11817 | 346     | 208     | 0.382  | 0     | 0.034 | 0.156 |
| DTH | DTH12058 | 11      | 160     | 0.373  | 0     | 0.006 | 0.169 |
| DTH | DTH12181 | 158     | 354     | 0.286  | 0     | 0.011 | 0.129 |
| DTH | DTH14130 | 11      | 97      | 0.289  | 0     | 0     | 0.127 |
| DTH | DTH15065 | 78      | 275.500 | 0.244  | 0     | 0.001 | 0.116 |
| DTH | DTH15139 | 12      | 358     | 0.375  | 0     | 0.028 | 0.157 |
| DTM | DTM00257 | 376     | 155     | 0.374  | 0     | 0     | 0.174 |
| DTT | DTT10009 | 702     | 147     | 0.283  | 0     | 0.010 | 0.125 |
| DTT | DTT10797 | 889     | 89      | 0.299  | 0     | 0     | 0.146 |
| DTT | DTT10880 | 6, 151  | 156     | 0.357  | 0     | 0     | 0.174 |
| DTT | DTT10881 | 2, 514  | 156     | 0.357  | 0     | 0     | 0.175 |
| DTT | DTT10986 | 20      | 120     | 0.425  | 0     | 0     | 0.194 |
| DTT | DTT11073 | 199     | 143     | 0.245  | 0     | 0     | 0.108 |
| DTT | DTT11169 | 39      | 108     | 0.290  | 0     | 0.008 | 0.132 |
| DTT | DTT11408 | 48      | 109     | 0.385  | 0     | 0     | 0.183 |
| DTT | DTT11547 | 1, 825  | 156     | 0.359  | 0     | 0.006 | 0.171 |
| DTT | DTT12206 | 22      | 190.500 | 0.229  | 0     | 0.011 | 0.097 |
| DTT | DTT14220 | 57      | 157     | 0.282  | 0     | 0.010 | 0.116 |
| DTT | DTT15443 | 143     | 156     | 0.355  | 0     | 0.005 | 0.168 |
| DTT | DTT15444 | 519     | 156     | 0.353  | 0     | 0     | 0.174 |
| DTX | DTX10131 | 120     | 141     | 0.255  | 0     | 0.013 | 0.110 |
| DTX | DTX10132 | 90      | 131.500 | 0.246  | 0     | 0.014 | 0.105 |
| DTX | DTX10177 | 2, 850  | 156     | 0.357  | 0     | 0     | 0.176 |
| DTX | DTX10212 | 101     | 138     | 0.391  | 0     | 0     | 0.181 |
| DTX | DTX10213 | 15      | 138     | 0.406  | 0     | 0     | 0.188 |
| DTX | DTX10945 | 10      | 87      | 0.451  | 0     | 0.126 | 0.097 |
| DTX | DTX11178 | 18      | 72      | 0.458  | 0     | 0     | 0.212 |
| DTX | DTX12196 | 26      | 165     | 0.273  | 0     | 0.024 | 0.105 |
| DTX | DTX12438 | 23      | 275     | 0.353  | 0     | 0.004 | 0.162 |
| RST | RST00001 | 22      | 140     | 0.349  | 0.014 | 0     | 0.153 |
| RST | RST00010 | 25      | 309     | 0.298  | 0     | 0.016 | 0.132 |
